# Exploring the potential of using simulation games for engaging with sheep farmers about lameness recognition

Matt L. Jones<sup>1</sup>, Maxwell S. Barnish<sup>2</sup>, Robert R. Hughes<sup>3</sup>, Aimee Murray<sup>1</sup>, Omid Mansour<sup>4</sup>, Tiziana Loni, Holly Vickery<sup>5</sup>, Myfanwy Lloyd Evans<sup>6</sup>, Laura Green<sup>7</sup>, Nervo Verdezoto<sup>4</sup>

- 
1. European Centre for the Environment & Human Health, University of Exeter Medical School, Knowledge Spa, Royal Cornwall Hospital, Truro, Cornwall, TR1 3HD, UK
  2. University of Exeter Medical School, South Cloisters, University of Exeter, St Luke's Campus, Heavitree Road, Exeter, EX1 2LU, UK
  3. Faculty of Engineering, University of Bristol, Bristol, BS8 1TR, UK
  4. School of Computer Science and Informatics, Human-centered Computing Group, Cardiff University
  5. School of Agriculture, Policy and Development, University of Reading, Reading, RG6 6AR, UK
  6. Ty Cerrig, Rhydymain, Dolgellau, Gwynedd, LL40 2B, UK
  7. Life and Environmental Sciences, University of Birmingham, Birmingham, B15 2TT, UK

## Abstract

**Introduction:** Computer simulation games are increasingly being used in agriculture as a promising tool to study, support and influence real-life farming practices. We explored the potential of using simulation games to engage with sheep farmers on the ongoing challenge of reducing lameness. Working with UK stakeholders, we developed a game in which players are challenged with identifying all the lame sheep in a simulated flock. Here, we evaluate the game's potential to act as a tool for to help assess, train and understand farmers' ability to recognise the early signs of lameness.

**Methods:** Participants in the UK were invited to play the game in an online study, sharing with us their in-game scores alongside information relating to their real-life farming experience, how they played the game, and feedback on the game. Mixed methods were used to analyse this information in order to evaluate the game. Quantitative analyses consisted of linear modelling to test for statistical relationships between participants' in-game recall (% of the total number of lame sheep that were marked as lame), and the additional information they provided. Qualitative analyses of participants' feedback on the game consisted of thematic analysis and a Likert Scale questionnaire to contextualise the quantitative results and identify additional insights from the study.

**Results:** Quantitative analyses identified no relationships between participants' (n = 63) recall scores and their real life farming experience, or the lameness signs they looked for when playing the game. The only relationship identified was a relationship between participants' recall score and time spent playing the game. Qualitative analyses identified that participants did not find the game sufficiently realistic or engaging, though several enjoyed playing it and saw potential for future development. Qualitative analyses also identified several interesting and less-expected insights about real-life lameness recognition practices that participants shared after playing the game.

**Discussion:** Simulation games have potential as a tool in livestock husbandry education and research, but achieving the desired levels of realism and/or engagingness may be an obstacle to

40 realising this. Future research should explore this potential further, aided by larger budgets and closer  
41 collaboration with farmers, stockpeople and veterinarians.

42

43

44

45

46

47

48

49

## 50 Background

51 Lameness is a change in animal gait that has various underlying causes, but is typically caused by  
52 bacterial infections of the hoof and foot (especially scald and foot rot) in farmed sheep, goats and  
53 cattle (Kaler et al. 2019). As a macro-level manifestation of microbial ailments, the first diagnosis of  
54 lameness can typically be made by farmers after visual observation of their livestock walking. Despite  
55 this, lameness is still a major burden on livestock farming, with some evidence that this is partly  
56 because farmers differ in their ability to recognise lameness, especially in its early stages (Whay et al.  
57 2003; Green and Clifton 2018). In UK sheep farming, lameness is estimated to cost farmers between  
58 £3.90 and £6.30 per ewe per year (Winter and Green 2017), and the industry as a whole £28-80 million  
59 per year (Nieuwhof and Bishop 2005; Wassink et al. 2010). As well as economic costs associated with  
60 veterinary expenses and livestock productivity losses, lameness also constitutes a substantial animal  
61 welfare (FAWC 2011; Nalon and Stevenson 2019) and antibiotic stewardship problem (Davies et al.  
62 2017), making it a priority issue for the sheep farming industry to address. In 2011, the Farm Animal  
63 Welfare Council (FAWC) challenged UK sheep farmers to reduce the average prevalence of lameness  
64 on UK sheep farms to less than 5% by 2016 and less 2% by 2021 - targets that were, at the time,  
65 considered achievable using evidence-based techniques (FAWC 2011). Whilst the initial 5% target  
66 appears to have been met - with a well-randomised study estimating the mean flock prevalence of  
67 lameness in the UK to be 3.5% (ewes) in 2013 (Winter et al. 2015) - there are signs that progress may  
68 have since stalled. The most recent (though non-randomised) study estimated a mean flock  
69 prevalence of lameness (ewes) of 3.2% in the 2018-2019 period, suggesting that farmers were not on  
70 track to reach the 2021 2% target (Best et al. 2021). Furthermore, there are indications of limited  
71 uptake and farmer scepticism towards some of the lameness-reduction techniques recommended by  
72 the FAWC (Best et al. 2020, 2021), and that the numbers of farmers practicing key effective treatments  
73 may be reducing over time (Prosser, Purdy, and Green 2019). Collectively, these observations  
74 suggest that new approaches might be needed to facilitate knowledge exchange between farmers  
75 and other interested parties to reduce lameness in the UK.

76 One new strategy to facilitate knowledge exchange between farmers and non-farmers that has  
77 recently been explored in agricultural education and research is the use of game-based approaches  
78 to facilitate innovation, participation and multiple stakeholders perspectives (Hernandez-Aguilera et  
79 al. 2020; Berthet et al. 2016). The progress of information and communication technology (ICT) has  
80 led to the development of farm-based computer and video games worldwide that have actively  
81 engaged players in virtual farming environments (Sutherland 2020). Indeed, computer-mediated  
82 virtual agricultural environments are well-established as mass-appeal simulation video games such  
83 as FarmVille and Farming Simulator, which serve as forms of entertainment for non-farmers and  
84 farmers alike (Lane 2018). However, more recently, virtual environments have begun to be used as  
85 pedagogic and research tools for engaging with farmers in order to address serious, real-world issues.  
86 Most commonly, researchers have explored the use of virtual environments for educational purposes,  
87 having benefits such as making agricultural training more logistically feasible, affordable and  
88 accessible (Barber 2016). Several projects have developed and explored the potential of games of  
89 this sort - including developing games for teaching crop cultivation and livestock breeding skills (Yoo  
90 and Kim 2014; Szilágyi et al. 2017), developing more all-encompassing agricultural training games  
91 (GATES 2019; Fountas, Spyros et al. 2019), and exploring the potential of virtual reality-assisted  
92 agricultural training (Barber 2016). Virtual agricultural environments may also serve less obvious  
93 knowledge exchange purposes; for example, to encourage the adoption of precision agriculture  
94 technologies (Pavlenko et al. 2021); to exchange knowledge and perspectives on farm design among  
95 farmers, researchers and advisors (Moojen et al. 2022); to facilitate information sharing among  
96 farmers and with non-farmer stakeholders dealing with agricultural issues (Hernandez-Aguilera et al.  
97 2020; Nuriitha, Widartha, and Bukhori 2017). The idea of using virtual environments as tools for  
98 engaging with farmers is thus being taken increasingly seriously; representing a new, innovative,

99 participatory, and even fun approach to understanding and addressing the real-world challenges of  
100 modern agriculture.

101 Here, we explore the potential of using computer-based gaming as an innovative approach to engage  
102 with UK sheep farmers and other stakeholders on the issue of the early recognition of the signs of  
103 lameness. Sheep lameness can be graded according to increasing severity of change in gait, and  
104 sheep farmers recognise different severities of lameness innately (Kaler and George 2011). Farmers  
105 that report that they recognise, catch and treat the first mildly lame sheep in a group experience lower  
106 prevalences of lameness compared to farmers who wait until sheep are more severely lame before  
107 they catch them (Kaler and Green 2008; Winter et al. 2015). Following a human-centered design  
108 approach, we developed a game (The Lameness Game) that is intended to support lameness  
109 reduction by serving as a tool to help assess, train and understand farmers' ability to recognise the  
110 early signs of lameness. We evaluated our game through an online evaluation study with participants  
111 playing and giving expert feedback on our prototype game, reporting our analysis of their in-game  
112 performance and feedback in order to assess the games' potential.

113 Figure 1: Screenshots of summarising the main features of the game. A) In the game, players are  
114 presented with a field of virtual sheep and the goal of observing them to identify those with a lame  
115 gait. B) Users can zoom in and select sheep, spraying them purple to mark them as lame C) At the  
116 end of the game (10 minute timer ends or users click 'Done'), users are presented with scores based  
117 on how many of the sheep they marked as lame were actually lame, as well as some related  
118 educational information.

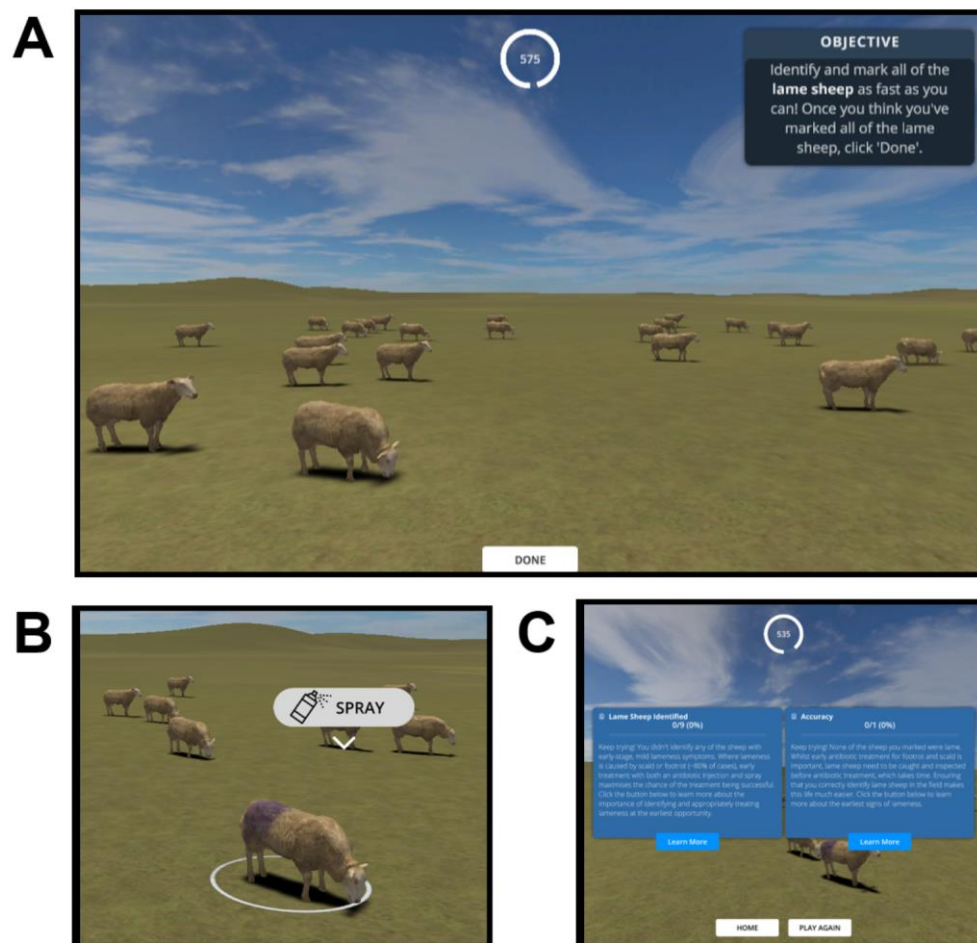

119

## 120 **Materials and methods**

### 121 **Description of The Lameness Game**

122 Our game was a single-player, casual simulation game in which players were set the goal of identifying  
123 all of the lame sheep in a virtual flock in the shortest time possible (Figure 1). During gameplay, the  
124 displayed environment resembles a farm field which is occupied by virtual sheep programmed to  
125 spend most their time grazing (~73% of the time) or standing (~23.5% of the time), but that  
126 occasionally walked (~3.5% of the time). These parameters were intended to be somewhat reflective  
127 of estimated real-life ovine activity budgets whereby walking constitutes a minority (~2-4%) of the total  
128 activity (Kaler et al. 2019; Bueno and Ruckebusch 1979), whilst also providing a small (but not  
129 impractically small) window of opportunity to identify lame sheep within the time-frame of a relatively  
130 short game. Players could navigate the environment with game controls that resemble those of a  
131 simplified real-time strategy game; up-down-left-right to move the camera to move the camera across  
132 the field (WASD keyboard keys), camera rotate to change the direction of camera (Q & R keyboard  
133 keys) and zoom controls to change the field of view of the camera (trackpad/mouse scroll). At the start  
134 of the game, a 'healthy' or 'lame' status is randomly assigned to each of the 24 sheep in the flock  
135 (i.e. on average 50% of the sheep were assigned to be lame via a coin-flip style mechanism, though  
136 this was not disclosed to the player), which determines the animation used when they walk (Figure  
137 1A). In our game, lame sheep exhibited a shortened stride on one (infected) leg, a quickened stride  
138 on the opposite leg, and a slight nodding of the head - approximating the signs of early lameness  
139 represented by Score 2 on the scale. When players identified a sheep they thought was lame, they  
140 could select it by clicking it with the left mouse button, upon which an icon appeared above the sheep's  
141 body that the users could click to mark the sheep as lame (Figure 1B). The sheep was then marked  
142 with a purple spray and its status changed to 'Marked as Lame' for the purposes of the in-game scoring  
143 system. At the end of the game, users received a score for their accuracy (% of sheep marked that  
144 were actually lame) and recall (% of the total number of lame sheep that were marked as lame), some  
145 educational feedback on their performance, as well as the time remaining on the in-game clock (Figure  
146 1C). Players were given a maximum of ten minutes to identify the lame sheep, but could choose to  
147 terminate the game and get their results early by clicking 'Done'.

148 The game was developed using a human-centered design (HCD) process in which potential users  
149 (farmers, farm veterinarians and academics in the field) were involved throughout all stages of the  
150 design process (Hanington 2017), and substantially shaped the final game we evaluate here  
151 (Supplementary Material 1; Supplementary Figure 1). The final game was built using game-  
152 programming software Unity and 3D modelling software Blender (Blender Foundation 2021) in  
153 collaboration by a game programmer (OM) and 3D artist/ animator (TL) using a mix of pre-made,  
154 modified and newly-created 3D models, animations and other digital assets (Red Deer 2020;  
155 Bicameral Studios 2018; Lehtonen 2017; Michsky 2021). The game runs standalone in a browser on  
156 desktop and laptops, preferably using the Google Chrome browser. A playable version of the game is  
157 available free of charge online (<https://wheres-woolly.itch.io/lameness-game>) and/or from the  
158 corresponding author.

### 159 **Evaluation of The Lameness Game**

160 The game was evaluated via an online study in which those with and without agricultural experience  
161 were invited to play the game online and fill in an after-game questionnaire via the Microsoft Forms  
162 platform (Supplementary Material 2). Through the after-game questionnaire, participants shared with  
163 us their in-game scores (those presented via the screen shown in Figure 1C) alongside feedback on  
164 the game. Participants were enrolled in the study by advertising it on social media and private mailing  
165 lists (targeting groups of interest where possible e.g. sheep societies), as well as during a workshop  
166 with University of Bristol Farm Animal Discussion Group (comprising veterinary practitioners, teaching

167 staff and researchers). Participation was incentivised by offering participants entry into a lottery to win  
168 one of three £50 vouchers for an online farm supplies shop in return for the approximately 30 minutes  
169 of participation time. This study was approved by the College of Medicine and Health research ethics  
170 committee at the University of Exeter (application number 21/01/275). To comply with ethical  
171 requirements, participants were required to read an information sheet and digitally sign a consent form  
172 before participating in the study.

### 173 **Participant recall scores in the game**

174 Quantitative evaluation of the game consisted of analysing the relationship between participants' recall  
175 scores in the game and data relating to their real-life experience and how they played the game (all  
176 self-reported in the after-game questionnaire; Supplementary Material 2). Our logic was that the game  
177 could serve as a tool for training, testing or studying real-life lameness recognition practices if  
178 participants were able to translate real-life experience and skills into higher in-game recall scores.  
179 Recall was calculated and reported alongside accuracy at the end of the game (Figure 1C) and as for  
180 all other data, participants shared these scores with the research team via the after-game  
181 questionnaire.

182 In order to test whether participants had played the game as intended before engaging in further  
183 analysis, we first used D'agostino's test to test for normality and skewness in participants' recall and  
184 accuracy scores. A range of recall scores is expected to be underpinned by generally high (negatively  
185 skewed) accuracy scores (i.e. the majority of scores above >50%) if participants had successfully  
186 engaged with the goal of the game (to mark all the sheep they think are lame) without 'cheating' (i.e. by  
187 taking a 'shotgun' approach and marking all sheep as lame). High accuracy scores also gave us a first  
188 indication that our animations of lameness were at least realistic enough for participants' to recognise  
189 as lameness.

190 Subject to confirming this, we then proceeded with a more quantitative analysis of participants' recall  
191 scores; seeking to identify a feasible linear model describing what (if anything) affected participants'  
192 recall scores (subject to them meeting the assumption of normality). In order to do this, a post-hoc  
193 power analysis was first performed to understand how complex a model we could build with the sample  
194 size (power) available. Accounting for our sample size ( $n = 63$ ), assuming stringent 95% power and 5  
195 significance thresholds, and the use of a linear model with 1 on 61 degrees of freedom (i.e. a single  
196 continuous or two-factor explanatory e.g. true-false type variable), we estimated that our study had  
197 the power to detect an approximately 'medium-to-large sized' effect ( $f^2 = 0.21$ ), *sensu* Cohen (1977).  
198 Accordingly, we tested different candidate linear models - each with a single explanatory variable  
199 describing what drove participants' ability to identify lame sheep in the game - until a feasible model  
200 was identified. Beginning with our first hypothesis that there was a relationship between participants'  
201 in-game scores and their real-life farming experience ('Farming Experience' hypothesis), we  
202 progressed through to models testing for an effect of lameness signs participants looked for during  
203 the game ('Lameness signs looked for' hypothesis), and finally for an effect of more idiosyncratic  
204 factors to do with user engagement ('User engagement' hypothesis). To choose the explanatory  
205 variable computed in each model considered, we used an exploratory data analysis approach (Tukey  
206 1977); plotting all variables relating to the hypothesis under consideration, and then choosing the  
207 variable(s) that visually appeared to have the strongest effect on recall scores for modelling (helping  
208 to mitigate against issues caused by multiple hypothesis testing). For the 'Farming Experience'  
209 hypothesis, candidate variables plotted and chosen from were: whether or not the participant had  
210 experience in farming/related field (TRUE/FALSE categorical variable of 2 levels derived from Q15 in  
211 the questionnaire); the perceived annual prevalence of lameness they had experienced if they had  
212 farming experience (categorical variable of 2 levels derived from Q19 in the questionnaire); the number  
213 of years they had spent working with sheep if they had farming experience (continuous variable  
214 derived from Q19 in the questionnaire). For the 'Lameness signs looked for' hypothesis, the candidate  
215 variables were the 9 signs of lameness that participants told us they did or did not look for e.g. uneven

216 posture, shortened stride on one leg when walking (TRUE/FALSE categorical variables of 2 levels  
217 derived from Q13 in the questionnaire). For the 'User engagement' hypothesis the candidate variables  
218 were: how many times the participant had played the game before submitting their scores (categorical  
219 variable of 5 levels derived from Q5 in the questionnaire); whether or not the participant had problems  
220 with the game's controls (TRUE/FALSE categorical variables of 2 levels derived from Q7 in the  
221 questionnaire); observing type/how the participant observed the sheep when playing the game  
222 (categorical variable of 3 levels derived from Q10 in the questionnaire); moving type/how the  
223 participant moved around the flock when playing the game (categorical variable of 4 levels derived  
224 from Q11 in the questionnaire); whether or not the participant completed the pre-game tutorial  
225 (categorical variables of 3 levels derived from Q6 in the questionnaire); the computer set-up/pointing  
226 device the participant used (categorical variables of 3 levels derived from Q7 in the questionnaire);  
227 and the time spent playing the playing (continuous variable derived from Q2 in the questionnaire). In  
228 total, we tested four models - one for the 'Farming experience' hypothesis, two for the 'Symptoms  
229 looked for' hypothesis, and one for the 'User engagement' hypothesis. P-values from each of the  
230 models were Bonferroni-corrected according to the number of previous models tested, and we  
231 stopped building models once a feasible model was identified (i.e. one with a p-value < 0.05). Our null  
232 hypothesis (H0) in all models was that our measured variable(s) did not affect participants' recall,  
233 whilst our alternative hypotheses was that the variable under consideration affected participants'  
234 recall.

235 This analysis was performed in the R programming language (R Core Team 2017) implemented via  
236 RStudio (RStudio Team 2020). Exploratory plotting to identify candidate variables for linear modelling  
237 was conducted using base R functions and the *beeswarm* function of the 'beeswarm' package (Eklund  
238 and Trimble 2021). Given that accuracy and recall scores were percentage data, they were both  
239 arcsine square root transformed using base R functions before being subjected to statistical testing  
240 (D'agostino's test and linear modelling). D'agostino's test was implemented via the *agostino.test*  
241 function of the 'moments' package (Komsta and Novomestky 2022). Power analysis was implemented  
242 via the *pwr.f2.test* function of the 'pwr' package (Champely et al. 2020). Linear modelling and  
243 Bonferroni correction of p-values was performed using base R functions.

#### 244 **Feedback on the game from those with real-life farming experience**

245 To help explain the results from the quantitative analysis of participants' recall scores and evaluate  
246 the game more broadly, we also collected feedback on the game from participants who had real life  
247 farming experience and conducted complementary qualitative analyses. We limited this data collection  
248 and evaluation to participants who had worked in farming or a related field (i.e. those who had  
249 answered 'Yes' to the question 'Have you ever worked in farming or a related field e.g. farm vet?')  
250 because this was the intended audience of the game. These participants with real-life farming  
251 experience directly evaluated the game in two ways; by providing open-form feedback in the after-  
252 game questionnaire, and by scoring evaluation statements on a Likert scale.

253 Open-form feedback provided an opportunity for participants to elaborate on their thoughts about the  
254 game and suggest new potential uses of it. This feedback was analysed using inductive thematic  
255 analysis, a qualitative analytical technique that involves finding patterns in a non-numerical dataset to  
256 understand participants' opinions, perspectives and experiences (Braun and Clarke 2006, 2021b).  
257 Thematic analysis values all participants' perspectives without privileging the one commonly/frequently  
258 expressed perspectives that might prioritise the quantification of patterns e.g. coding reliability  
259 approaches, underpinned by positivist approaches and quantitative methods (Braun and Clarke  
260 2021a, 2021a). We conducted thematic analysis on free-text feedback from those who provided it (n  
261 = 19, from the total of 31 participants with real-life farming experience). Statements were coded and  
262 then reported in terms of themes, each consisting of one or multiple conceptually linked sub-themes.  
263 Supporting quotes were noted to illustrate each sub-theme. Analysis was initially conducted  
264 independently by two researchers (MSB and NVD) reading and coding all free-text feedback and

265 identifying the initial themes. Any discrepancies (e.g. disagreements in assignment of comments to  
266 themes, comments fitting more than one theme) were initially discussed between these two  
267 researchers then an agreed analysis was circulated to three further researchers (MLJ, RH and AM)  
268 for peer validation, feedback and finalisation.

269 In the Likert scale sub-questionnaire, participants rated the game on such factors as its educational,  
270 realism and entertainment value - potential uses of the game that we had in mind when designing it in  
271 consultation with stakeholders (Supplementary Material 1). Since this data was only collected for one  
272 group (those with real-life farming experience), there was no formal analysis of this data and the data  
273 were only plotted and described to qualitatively inform the interpretation of results and evaluation of  
274 the game.

## 275 Results

### 276 Study participants

277 A total of 63 people participated in the study; 32 had not worked in farming or a related field, and 31  
278 had worked in farming or a related field. Of those with farming experience, the majority (30/31) had  
279 worked with sheep either as farmers (12/31), stockpeople (8/31), veterinarians (9/31), or in other roles  
280 (9/31) such as livestock technicians or in agricultural research or policy (N.B. individual participants  
281 often had experience in multiple fields, hence numbers do not total 31). Most of those who shared  
282 information about the levels of lameness they had experienced in the flocks with which they had  
283 worked said that they had experienced annual lameness levels of between 5 and 10% (13/29).

284 Figure 2: Comparison of distributions of participants' (n=63) accuracy i.e. number of sheep they  
285 marked as lame that were actually lame) and recall (i.e. number of the total lame sheep in the flock  
286 that they marked) scores. Individual participant data points are jittered using the beeswarm algorithm  
287 (R Package 'beeswarm') and mean recall scores are plotted as bold horizontal lines underneath the  
288 data points.

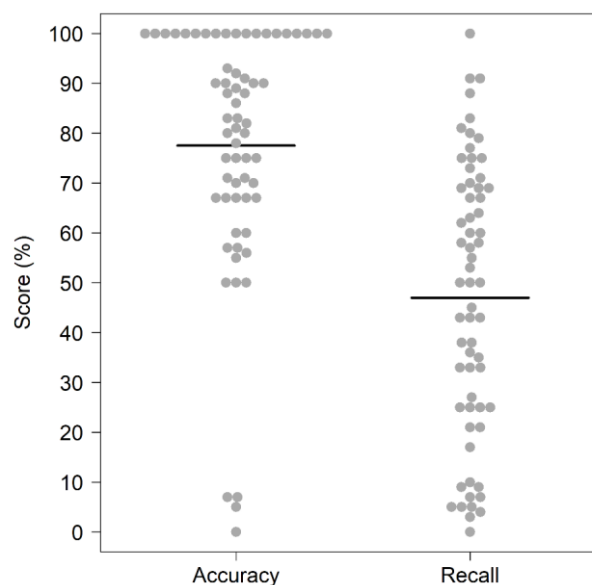

289



## 290 Participant recall scores in the game

291 Participants' accuracy and recall scores were distributed as expected, permitting deeper analysis of  
292 participants' recall scores (Figure 2). The majority of participants (%) had accuracy scores above 50%  
293 (D'Agostino's test; skew=-1.53, kurtosis = -4.24, p-value = <0.01), indicating that they were not simply  
294 'cheating' the game by taking a 'shotgun' strategy of marking all or most of the sheep as lame in order  
295 to maximise their recall scores. High overall accuracy scores also indicated that our animations of  
296 lameness were at least realistic enough for participants to recognise them as lameness, further  
297 indicating that variation in recall scores was likely to reflect some level of skill in spotting lameness.  
298 Recall scores themselves were normally distributed across the entire percentage range (Figure 2;  
299 D'Agostino's test; skew=-0.12, kurtosis = -0.44, p-value = 0.7), precluding a parametric analysis of the  
300 factors influencing participants' these scores.

301 Figure 3: Relationships between participants' recall scores and their real-life farming experience. A)  
302 Recall scores of those without and with farming experience; B) Recall scores and years of farming  
303 experience spent working with sheep (for participants with farming experience). C) Recall scores  
304 according to the perceived levels of lameness experienced in real-life flocks (for participants with farming  
305 experience who answered this question). For categorical variables, individual participant data  
306 points are jittered using the beeswarm algorithm (R Package 'beeswarm') and mean recall scores are  
307 plotted as bold horizontal lines underneath the data points. Mean recall scores coloured red are those  
308 likely to be poor estimates due to small sample sizes i.e. the lower or upper quartile exceeds the 95%  
309 confidence limits of the mean. The plot is framed in a bold outline if that relationship was formally  
310 tested statistically.

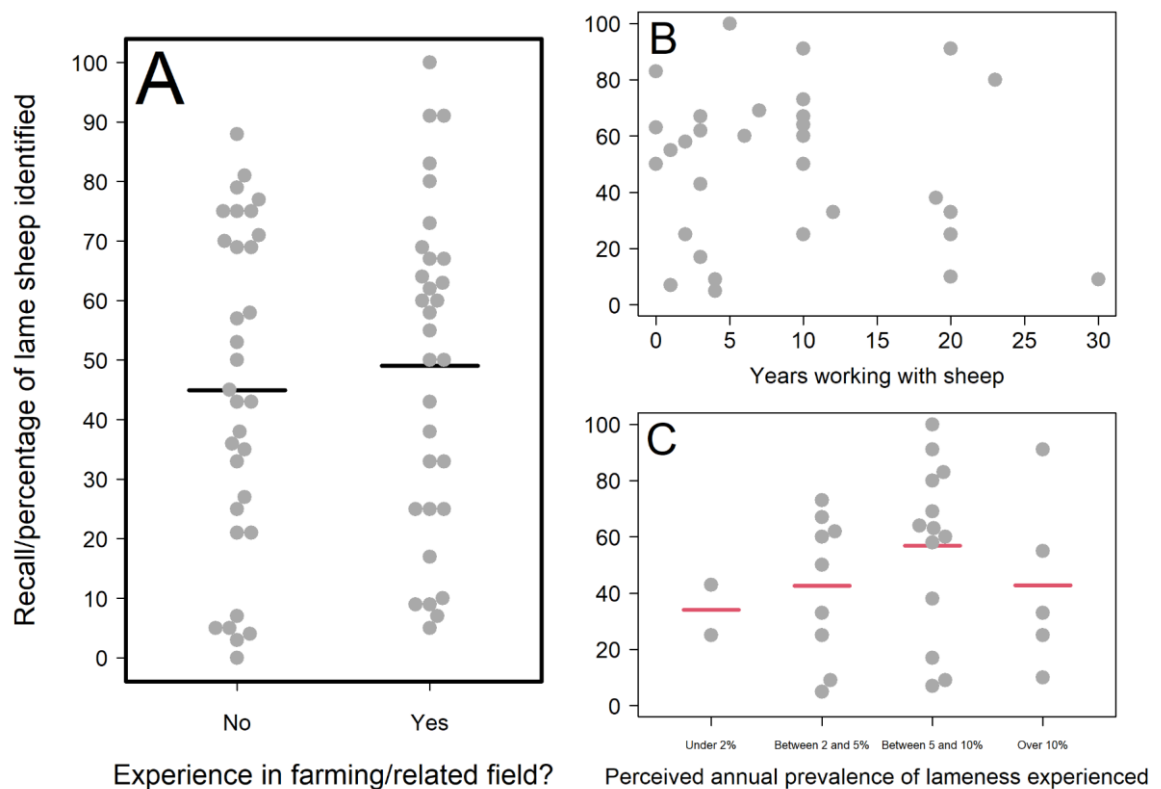

311

## 312 Farming experience

313 There was no evidence that real-life farming experience was driving the variation in participants' recall  
314 scores (Figure 3). Initial visual examination of exploratory plots of the data identified no difference in  
315 recall scores according to whether participants had ever worked in farming or a related field (Figure  
316 3A). There were also not visually observable relationships between recall and the number of years the  
317 participants had spent working with sheep (Figure 3B), or the level of lameness those who had worked  
318 with sheep had experienced in the sheep flocks with which they had worked (Figure 3C) - suggesting  
319 no higher-level relationships among those with farming experience. Formal statistical testing of the  
320 relationship between recall and whether or not the participant had worked in farming or a related field  
321 (which encompassed the entire dataset) revealed no significant difference. Those who had not worked  
322 in farming or a related field ( $n = 32$ ) identified a similar percentage of the lame sheep in the game as  
323 those who had worked in such fields ( $n = 31$ ) ('Farming Experience' model;  $R^2_{adj}=0.01$ ,  $p$ -value = 0.4,  
324  $F = 0.64$ , 1 on 61 DF; Supplementary Figure 2).

## 325 Lameness signs looked for

326 The lameness signs that participants looked for when playing the game were not differentiated by  
327 whether they had real-life farming experience (Supplementary Figure 3). Those with farming  
328 experience tended to more often look for lameness signs, but there was no statistical difference in the  
329 distribution of the signs they looked for compared to those without farming experience ( $X^2 = 4.77$   $df$   
330  $= 8$ ,  $p = 0.8$ ). This suggested that there was potential for an effect of lameness signs looked for that  
331 was not already captured in the 'Farming Experience' model.

332 However, when we explored this possibility using exploratory data analysis, no such effects were  
333 apparent. All of the relationships between in-game recall scores and the signs participants looked for  
334 were weak according to initial visual observation of the plotted data (Figure 4). Lameness signs that  
335 we included in the animation and deemed to be the most obvious signs of lameness in the game  
336 (uneven posture and nodding of the head) were not strongly related to participants' recall scores. For  
337 several signs, the number of participants looking or not looking for the sign was too small to accurately  
338 compare the two mean recall scores (red-coloured mean lines). The three relationships with the  
339 strongest visual differences in the means were that participants who looked for uneven posture or  
340 differing leg speeds (i.e. a limp which we included in the animation as a more subtle lameness sign)  
341 scored higher, whilst those who looked for sheep unable to bear weight on a leg whilst standing (a  
342 sign of more advanced lameness that was not included in our animation of early lameness) scored  
343 lower. However, when statistically tested, neither looking for uneven posture ('Lameness signs looked  
344 for' model A;  $R^2_{adj}=0.02$ ,  $p$ -value = 0.5,  $F = 1.32$ , 1 on 61 DF; Supplementary Figure 4), looking for a  
345 limp ('Lameness signs looked for' model A;  $R^2_{adj}=0.02$ ,  $p$ -value = 0.7,  $F = 1.52$ , 1 on 61 DF;  
346 Supplementary Figure 5) or looking for a raised leg ('Lameness signs looked for' model B;  $R^2_{adj}=0.04$ ,  
347  $p$ -value = 0.5,  $F = 2.57$ , 1 on 61 DF; Supplementary Figure 6) were predictive of participants' recall  
348 scores.

349

350 Figure 4: Relationship between participants' recall scores and the signs they looked for when playing  
351 the simulation game. Recall scores of participants that did not and did look for each of 8 classic signs  
352 of various stages of lameness (Kaler and Green 2008), plus an extra category of 'Other' signs looked  
353 for which we asked participants to elaborate upon. For categorical variables, individual participant data  
354 points are jittered using the beeswarm algorithm (R Package 'beeswarm') and mean recall scores are  
355 plotted as bold horizontal lines underneath the data points. Mean recall scores coloured red are those  
356 likely to be poor estimates due to small sample sizes i.e. the lower or upper quartile exceeds the 95%  
357 confidence limits of the mean. The plot is framed in a bold outline if that relationship was formally  
358 tested statistically.

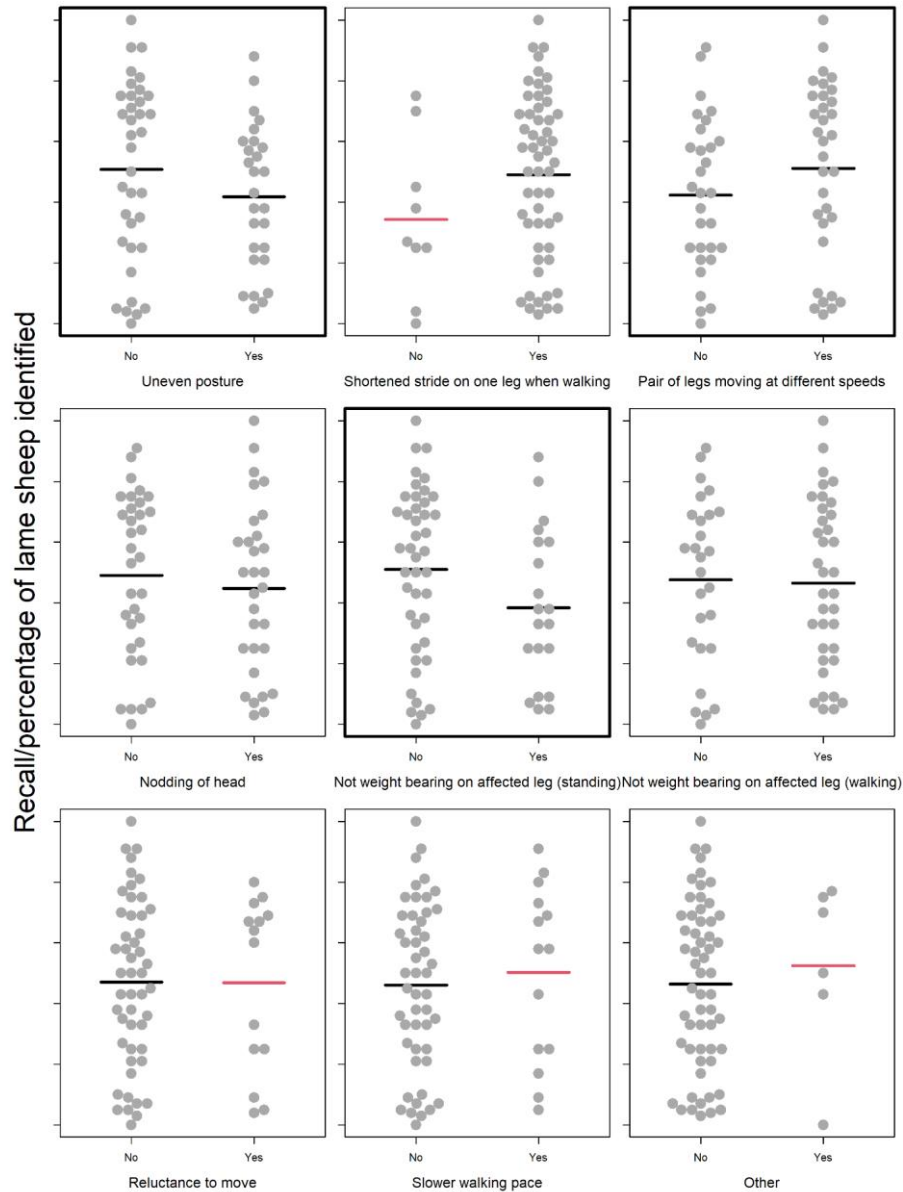

359

360

361 Figure 5: Recall scores of participants according to B) How many times participant played the game  
362 before submitting scores; B) Whether participant had problems using the game controls; C) Whether  
363 participant observed the sheep up-close, from afar and then zooming in, or using another strategy  
364 (e.g. combination of the two); D) How the participant navigated the virtual field to identify sheep; E)  
365 Whether the participant completed the pre-game tutorial; F) The participant's computer set-up/pointing  
366 device; G) The time the participant spent playing the game. For categorical variables, individual  
367 participant data points are jittered using the beeswarm algorithm (R Package 'beeswarm') and mean  
368 recall scores are plotted as bold horizontal lines underneath the data points. Mean recall scores  
369 coloured red are those likely to be poor estimates due to small sample sizes i.e. the lower or upper  
370 quartile exceeds the 95% confidence limits of the mean. The plot is framed in a bold outline if that  
371 relationship was formally tested statistically. For a more detailed explanation of what the categories  
372 mean (particular for 'Observing type' and 'Moving type') please refer to Supplementary Material 2

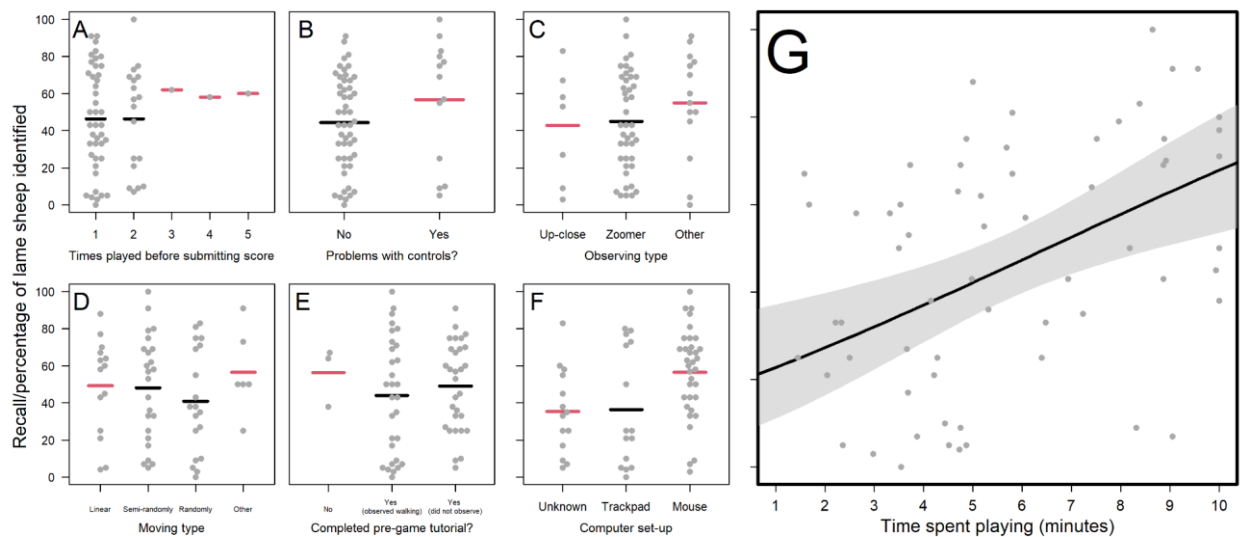

373

## 374 User engagement

375 Similarly to the 'Farming experience' and 'Lameness signs looked for' variables considered, most  
376 aspects of participants' user engagement did not have a strong effect on recall scores, with recall  
377 scores either widely distributed within, or thinly spread across, the explanatory categories considered  
378 (Figure 5A-F). The exception to this was that the time spent playing was positively and linearly related  
379 to in-game recall (Figure 5G), which formal statistical testing confirmed ('User Engagement' model;  
380  $R^2_{adj}=0.17$ ,  $p\text{-value} < 0.01$ ,  $F = 12.65$ , 1 on 61 DF; Supplementary Figure 7). Specifically, within the  
381 range playing lengths observed (1.45-10 minutes), participants identified an average of 2 additional  
382 sheep for every additional minute played.

## 383 Feedback on the game from those with real-life farming experience

### 384 Feedback received as open-form responses

385 19 out of 31 participants with real-life farming experience provided additional free-text feedback  
386 (alongside the Likert scale feedback) on the game and their experience playing it. During the  
387 qualitative thematic analysis (Braun and Clarke 2006) of these responses, five key themes emerged:  
388 the perceived realism of the game, reflective experiences, challenges of playing the simulation game,  
389 emotional responses to the game, and participants' suggestions for improvement.

### 390 *Perceived realism of the game*

391 Participants with real-life farming experience commented on their perceptions of how realistic the  
392 game was as a simulation of real-life experiences with sheep on the farm. Opinion regarding the  
393 realism of the simulation was split, with some participants considering that the simulation was “*really*  
394 *realistic*” and “*mimicked sheep well*”, and others expressing that they thought our animations were not  
395 sufficiently realistic to enable them to apply their real-life experience of spotting lameness in the game.  
396 For example, one participant simply remarked that the simulation was “*not realistic*”, while another  
397 noted in particular that “*the main issue was the unrealistic movement of the feet on the ground while*  
398 *standing*” - an animation bug that was known to researchers, but considered minor and impractical to  
399 fix before study initiation given timeframe/budget available.

### 400 *Technical challenges playing the simulation game*

401 Participants with real-life farming experience commented on a range of technical challenges relating  
402 to the game simulation that hindered their ability to engage with and benefit from the game. Four  
403 different aspects were identified as sub-themes: lack of movement of the sheep; simple, unnatural  
404 and confusing game simulation of sheep behaviour; inability to mark non-lame sheep; usability and  
405 animation/simulation issues.

406 The first sub-theme, the lack of movement of the sheep, concerned the perceived staticness of the  
407 digital sheep and the inability of the player to affect it. Additionally, we considered that the challenge  
408 of spotting very subtle signs of lameness efficiently when only presented with glimpses of the  
409 behaviour was a key skill to early identification of lameness in the flock. However, as one participant  
410 observed, “*lameness is not often identified when animals are static in the field, more often when*  
411 *animals are being moved or handled*”. A key issue for participants appeared to be that that we did not  
412 fully simulate the real-life behaviour of farmers “*working the flock*”, whereby the farmer or stockperson  
413 moves around and through to flock to stimulate sheep movement: “*I think most farmers would say that*  
414 *they also assess lameness by making the sheep walk / move away from them rather than just wait*  
415 *until they walk*”.

416 The second sub-theme, the ‘simple, unnatural, and confusing game simulation’, concerned  
417 distractions brought about by the games’ computational performance as a consequence of the  
418 perceived realism of the game previously described. Commenting on the ‘foot slide’ bug, one  
419 participant noted that while “*the sheep animations are good, but to a trained eye I found them*  
420 *confusing, e.g. none of them stood grazing in a normal posture because they were all jiggling their*  
421 *legs all the time*”. In addition to the ‘foot slide’ bug, there were other technical challenges such as  
422 game lag and stilted movement, reflecting limitations of the technical systems involved in presenting  
423 the game to players online. For example, one participant commented that it was “*sometimes difficult*  
424 *to tell if a normal movement of sheep was a game lag*”, while another considered that the “*movement*  
425 *[was] stilted which made identifying slightly lame sheep virtually impossible*”.

426 The third sub-theme was the inability to mark non-lame sheep. The fact that there was no means to  
427 mark non-lame sheep in the game made it more difficult for participants to remember which sheep  
428 they had already assessed, though this was also an intentional design choice. We omitted this feature  
429 after discussion with our advisory board, because we considered that in real-life situations of  
430 assessing lameness, only lame sheep are usually marked. One participant’s comment composed this  
431 theme, mirroring the difficult compromise between playability and realism that we encountered when  
432 designing the game: “*It was a bit frustrating not to be able to mark non-lame sheep when surveying,*  
433 *but that is more realistic and requires strategy*”.

434 The last sub-theme concerned usability and animation/simulation issues. A lack of smoothness in  
435 game animations was commented on in particular by one participant who noted that this issue made  
436 “*the distinction between a normal walking gait and a limp less easy to discern*”. Meanwhile, another

437 participant noted a lack of clarity in the graphics, which meant “*it was hard to see if they were holding*  
438 *a leg slightly up*”. Another participant also mentioned the ‘foot slide’ bug, which was commonly  
439 commented on by participants from a range of perspectives, as reflected in the previous sub-themes.

#### 440 *Emotional responses to the game*

441 Participants with real-life farming experience frequently used the open-form feedback request to  
442 express how they felt playing the game, with the 5 key sub-themes emerging in thematic analysis:  
443 enjoyment, interest, boredom, frustration, and lack of appeal.

444 Some participants express positive feelings about the game such as enjoyment (sub-theme 1), saying  
445 that they “*enjoyed the game*” and found it “*entertaining*”. Others expressed interest in the game (sub-  
446 theme 2), with one commenting that it was “*interesting to be looking for signs in virtual sheep*” and  
447 another that they “*thought this was brilliant*”.

448 However, some participants also expressed negative feelings toward playing the game. Boredom  
449 (sub-theme 3) and frustration (sub-theme 4) were expressed, and appeared to be mostly related to  
450 the staticness of the sheep and their inability to affect it (theme 3: sub-theme 1). For example, one  
451 participant noted that they became “*bored waiting for the sheep to move*”, and similarly others  
452 commented that the game was “*frustrating*” or “*very frustrating*” to play (sub-theme 4), with one noting  
453 explicitly that the cause of their frustration was “*waiting for the sheep to move*”. In addition, one  
454 participant expressed a more general lack of appeal (sub-theme 5), such as “*This sort of game doesn’t*  
455 *appeal to me I’m afraid. I’ve always worked in the real world*”.

#### 456 *Reflective experiences*

457 Participants with real-life farming experience also reflected on the experience of playing the game and  
458 the strategies they employed to identify lame sheep. For example, one participant emphasised how  
459 the game “*allowed me to get a better sense of my knowledge and skills*”, reinforcing how the game  
460 could enable participants to take stock of their current stockpersonship skills, and serve as a useful  
461 benchmarking exercise. However, others found the game too easy as one participant commented that  
462 “*lame sheep aren’t always that easy to spot in a field*”, while another commented that “*I think most*  
463 *sheep farmers know the signs of lameness*”. Considering strategies, participants mentioned that in  
464 real life, it was important to “*walk around the flock*”, and noted that the sheep “*would move*” in response  
465 to the farmer’s movements in a more realistic setting.

#### 466 *Participants’ suggestions for improvement*

467 Participants with real-life farming experience also offered suggestions for improvement to the game  
468 or to inform future games in this field. These suggestions fell into two broad categories.

469 Firstly, in line with other feedback, there were suggestions relating to making sheep move, e.g. using  
470 additional mechanisms and characters. Creating more natural movement patterns, rather than just a  
471 realistic gait, was considered an important priority for future improvement. Participants offered a range  
472 of perspectives on how to make the sheep move, but a common view was that it was important to be  
473 able to actively move the sheep, as a farmer would in a real-life field, rather than passively waiting for  
474 the sheep to move in order to be able to assess gait, as in the current game. For example, one  
475 participant suggested: “*If there was a way to make each sheep move, that would really help to keep*  
476 *engagement*”. Meanwhile, another participant suggested adding a sheep dog character to “*run round*”  
477 the sheep, while another suggested “*walking a person around so they [the sheep] walk away from*  
478 *you*”. It was commonly agreed that active flock management would be needed for the game  
479 experience to be realistic.

480 Secondly, other participants suggested providing additional visual or sound feedback in the game.  
481 One participant commented that visual feedback could be reinforced by offering a “*slightly more*

482 *realistic depiction of sheep movement for non-lame sheep*, while another participant considered that  
 483 auditory feedback regarding the correct identification of a lame sheep, *“maybe a sound...as you chose*  
 484 *the correct animals*”, could be a useful addition.

#### 485 Feedback received via the Likert-Scale Questionnaire

486 Feedback from a Likert-Scale questionnaire suggested that the 31 participants with real-life farming  
 487 experience could see the potential of games like ours as professional training-type tools in agriculture,  
 488 but were unsure whether our prototype had realised this potential fully (Figure 6). The majority of  
 489 participants agreed with statements related to the purpose (“It is clear to me how the contents of the  
 490 game are related to my profession”; 87%) and usability (“The game rules are easy to understand”;  
 491 87%) of the game. Similarly, statements expressing the educational potential of the game - “Learning  
 492 to play this game was easy” (77%), “The contents and structure helped me to become confident that  
 493 I would learn with this game” (71%), and “I would recommend this game as a form of  
 494 training/educational tool” (65%) - received agreement from the majority of participants. However, there  
 495 was lower agreement with the statement expressing that this educational potential had been achieved  
 496 (“I feel satisfied with the things that I learned from the game”; 45%). Regarding statements related to  
 497 the realism of the game, there moderate agreement (56%) with the statement “I achieved the goals of  
 498 the game by applying knowledge” and low agreement (38%) with the statement “The game is a  
 499 realistic representation of recognising sheep lameness in the field”. Statements related to the  
 500 entertainment value of the game received varied responses. Most participants felt the game offered  
 501 an appropriate level of challenge (68%), and expressed that they had some fun playing (61%).  
 502 However, many participants appeared to find the game boring by the end of playing; expressing that  
 503 they felt the game became monotonous as it progressed (55%) and not recommending it as a form of  
 504 entertainment (48%). The game was not deemed particularly absorbing, as reflected by the fact that  
 505 most participants did not lose track of time (77%) or forget about their immediate surroundings (58%)  
 506 while playing the game.

507 Figure 6: Quantitative feedback given on the game via a Likert Scale questionnaire. Statement rated  
 508 are shown on the rows, with the total percentages of participants with farming experience responding  
 509 negatively, neutrally and positively to the statements overlaid on the stacked bar graph.

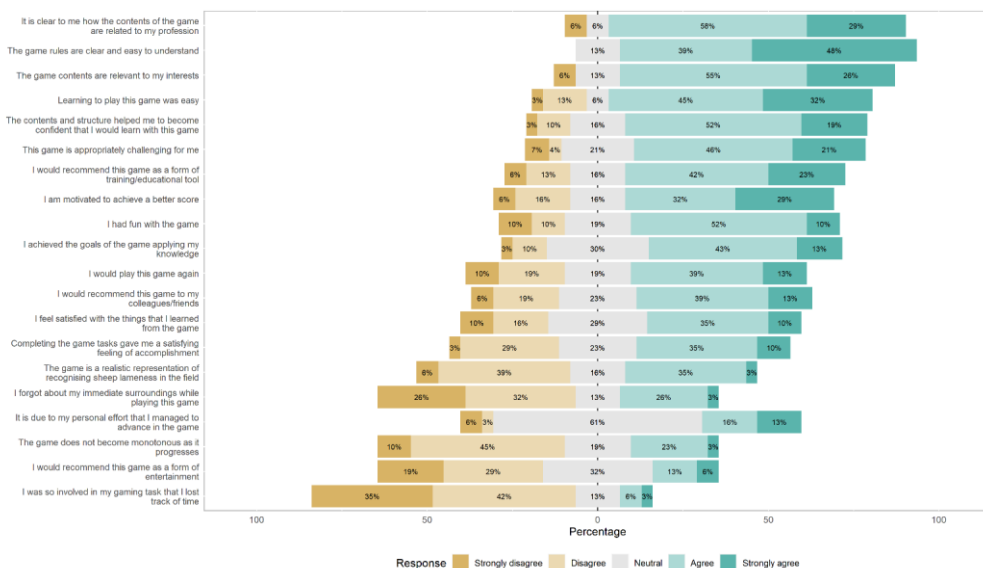

510

## 511 Discussion

512 Our online evaluation study highlighted the challenges and opportunities of using simulation games  
513 for the purposes of supporting real-life livestock husbandry practices. Whilst positive feedback from  
514 participants indicated signs of potential for using simulation video games in this context, barriers to  
515 this audiences' user engagement with computer games like ours hindered this potential from  
516 manifesting more widely. Particular barriers included participants' apparent desire for high levels of  
517 realism and engagingness in the game - expectations which we struggled to meet and therefore limited  
518 the game's ability to function as a tool for quantitatively assessing, train and understand farmers' ability  
519 to recognise the earliest, subtlest signs of lameness. Nonetheless, the results of the study provide  
520 valuable insights for the design and use of future similar games and studies in livestock husbandry.

### 521 User engagement shapes in-game performance where participants 522 struggle to relate to the simulated environment

523 There was substantial variation in participants' recall scores that was not well explained by the  
524 metadata about participants that we collected via the after-game questionnaire. Thus, even if effects  
525 of real life farming experience or the lameness signs looked for were influencing participants' recall  
526 scores, they may have been outweighed by the effects of these unknown causes of variation. Whilst  
527 it is hard to guess what these causes are, the finding that the time spent playing was the only driver  
528 of participants' in-game performance, alongside the results of our qualitative analyses, suggest that  
529 the results were at least partly due to participants not finding the game sufficiently realistic or engaging.

530 Regarding realism, although participants' explicit statements about the game's realism were split,  
531 many of the other themes identified in participants' feedback related back, in some way, to the game  
532 not sufficiently reflecting real life. Statements expressing the realism of the game were also generally  
533 disagreed with in the Likert-Scale questionnaire, suggesting most participants had some issues with  
534 the realism of the simulated experience. Our pursuit of realism during the game development process  
535 was heavily motivated by early interviews with farmers, who were the intended audience of the game  
536 (Supplementary Material 1). Although our sample size of potential users was small and may not be  
537 reflective of all the potential users of such games, there was a consistent feeling among interviewees  
538 that a research/education game of this sort should reflect real-life scenarios as accurately as possible.  
539 However, the difficulties we faced in achieving this desired level of 'realism' probably limited the  
540 game's potential as tool for training or assessing farmers' lameness recognition skills direct. Certainly,  
541 some level of realism was achieved; the high accuracy scores of all participants indicated that  
542 participants could recognise our virtual lame sheep as lame (Figure 2). However, the lack of an  
543 expected difference in recall scores between those with and without farming experience, alongside  
544 the lack of an effect of the lameness signs looked for, suggests that our animations were perhaps too  
545 obvious. As one farming-experienced participant's feedback attested to, in the field sheep behaviour  
546 is much more complex (e.g. hiding weaknesses from farmers as part of their prey instinct), and farmers  
547 look for a wide variety of body language cues when they observe a sheep's gait for lameness beyond  
548 just the textbook examples.

549 Another possible reason recall scores in the game failed to reflect real-life experience and skills is that  
550 the game was not sufficiently engaging for participants to play. Some participants expressed boredom  
551 or frustration in the after-game feedback, which is probably the reason many quit the game early  
552 (reflected by the wide range of times spent playing in Figure 5). Again, this was partly related to  
553 realism; in the pursuit of realism, we probably made the game overly long and sacrificed entertainment  
554 value. For example, the decision to program the sheep to only walk intermittently to better reflect real  
555 life behaviour lead us to develop a game that was 10 minutes long to ensure participants had a  
556 sufficient opportunity to observe each of the 25 sheep in the virtual flock walking at least once.  
557 Especially considering that the game consisted of repeating one task, this may have caused many



558 participants to quit the game early, impacting their recall scores. Although an overemphasis on the  
559 “fun factor” can be detrimental to the use of games in non-gaming contexts like agriculture (Monk  
560 2002), game-based approaches must still achieve a user experience that is to some extent playful  
561 and engaging (Treiblmaier, Putz, and Lowry 2018), especially as many people hold preconceived  
562 notions that video games are always designed for the purpose of entertainment. More technical  
563 problems such as in-game ‘bugs’ and problems participants had engaging with the virtual flock may  
564 have further limited the game’s engagingness. Again reflecting of the minutiae of signals that farmers  
565 process when trying to recognise lameness, in-game malfunctions such as the foot-sliding ‘bug’ -  
566 which we considered relatively inconsequential and not a priority (in terms of what was feasible given  
567 the predetermined project budget and time frame) to fix before the study roll-out - turned out to be  
568 quite distracting for some participants. More generally, the inability to move the virtual sheep and ‘work  
569 the flock’ was frustrating for some participants, who expressed that passive observation was not an  
570 efficient way to identify lameness.

571 Finally, we would like to highlight the importance of budgetary limitations in limiting our ability to  
572 achieve the levels of realism and engagingness that participants expected. Although we worked with  
573 a skilled game programmer and animator experienced in scientific animation, we were not always able  
574 to make the most of their skills due to the constraints of our £5000 budget (Supplementary Material  
575 4). This limited the time the game programmer and animator had available to work on the project, and  
576 they were thus not always able to make use of the feedback and support that was available from the  
577 review and testing stages (e.g. addressing boredom issues or the ‘foot slide’ bug). Furthermore,  
578 funding was not sufficient to enable us to hire someone with subject-specific expertise (e.g. a sheep  
579 farmer) to directly work with the game developer and animator on a day-to-day basis (which they  
580 expressed would have helped). We therefore strongly recommend that future grant applications for  
581 serious game projects seek sufficient funding to cover more of the primary game developers’ time and  
582 also facilitate much closer, more direct collaboration between the game developers and the game’s  
583 intended audience. This would enable design choices to be driven by the intended audience’s  
584 involvement and not by what is feasible due to budget limitations, increasing game acceptance and  
585 the potential benefits of this medium.

## 586 **Insights on lameness recognition practices**

587 Our study did reveal some interesting insights on lameness recognition and produce some evidence  
588 of future potential for using games as a tool in livestock husbandry education and research.

589 Firstly, our inter-disciplinary study points to the way in which animal ailments like lameness may resist  
590 precise scientific definitions. Despite the highly controlled *in silico* laboratory we created in which  
591 lameness is precisely programmed into the virtual flock, we nonetheless observed a wide variety of  
592 recall scores. Although we primarily attribute this to the effect of time spent playing (supported by our  
593 quantitative analysis) and the difficulty of adequately mimicking real-life in a video game (supported  
594 by our qualitative analysis), our results are also likely to reflect the inherent subjectivity involved in  
595 assessing lameness. Previous research has shown that even when observing (videos of) real sheep,  
596 farmers and other specialists vary substantially in what they define as lame (especially for early  
597 lameness), with different ‘thresholds’ for defining lameness and acting upon it (Kaler and Green 2008).  
598 Thus whilst “*most sheep farmers know the signs of lameness*”, as one participant commented,  
599 lameness is a spectrum that may resist a precise definition and be tied up with individual farmers’ lived  
600 experience. The use of mixed methods reveals this acutely, lending a unique level of support to the  
601 hypothesis that subjective experience must be better considered when seeking to design interventions  
602 for livestock husbandry issues like lameness in farming.

603 Similarly, some of our results suggest that the game produced a level of understanding that would not  
604 have been so easily achieved with solely survey-based methods, allowing farmers to engage with  
605 researchers in novel ways. In particular, we note that the process of researchers illustrating (through

606 the creation of a game) their 'vision' of what lameness recognition on the farm looks like (and  
607 requesting feedback from those with real-life farming experience on this) facilitated conversations  
608 about lameness that perhaps may not have happened with solely survey-based methods - one of the  
609 main benefits of the human-centered design approach. Participants reacted strongly to the artificial,  
610 simplified world we created, telling us what was missing from our vision and highlighting the limitations  
611 of our understanding as academics, proving the utility of iterative prototyping (Lim, Stolterman, and  
612 Tenenberg 2008). A notable example of this was those with real-life farming experience questioning  
613 our assumption that early lameness recognition depended on passive observation and making clear  
614 that it depends on actively 'working the flock'. Similarly, participant feedback and performance data  
615 suggesting that the game easy revealed how academics might misdiagnose real-life problems (and  
616 by implication, prescribe flawed solutions); revealing that the decision-making challenge in lameness  
617 management may not lie in being able to recognise lameness early, but in being able to act upon this  
618 knowledge accordingly (e.g. in finding time and resources to catch and treat sheep). Such  
619 assumptions may not have been obvious in a less creative, interdisciplinary project, and has  
620 implications for managing lameness in the real-world; suggesting that finding ways to embed  
621 lameness reflection and monitoring into existing shepherding practices might help reduce lameness  
622 more than trying teach farmers the signs of lameness.

623 Finally, on a more fundamental level, the game-based, incentivised study appeared to function well  
624 as a 'hook' to encourage agriculturalists to discuss and participate in a more conventional survey about  
625 managing animal health. Many participants shared positive feedback on the game, especially with  
626 regards to its potential as an educational tool (even if this had not been fully realised). Furthermore,  
627 anecdotally at least, some agriculturalists suggested that the novelty of using a game made the study  
628 more appealing (especially when compared to solely survey-based studies that they often get requests  
629 to participate in). The game also supported experiential learning through reflection and facilitated the  
630 acquisition of up-to-date information on lameness recognition in UK farmers. Agriculturalists were  
631 clearly at least trying to spot lameness in the virtual sheep as they would for real-life sheep, and some  
632 explicitly expressed that it allowed them to take stock of their real-life practice. The fact that those with  
633 farming experience tended to look for lameness signs more often (Supplementary Figure 3) is  
634 consistent with the previously reported finding that most farmers know how to identify lameness (Kaler  
635 and Green 2008), though a larger sample size would be needed to confirm this. New sociological tools  
636 like games may therefore at least help facilitate survey methods and encourage more active  
637 participation and engagement between farmers and researchers, as well as support learning through  
638 reflection.

## 639 **Implications for use of games in livestock husbandry**

640 Our findings have important implications for the future development of games intended as tools to  
641 engage with farmers on livestock husbandry issues such as lameness and stockpersonship. In  
642 particular, they highlight that future similar projects should consider carefully whether games are best  
643 used as 'virtual laboratories' to study and train participants, or more as tools to facilitate discussion  
644 between researchers and stakeholders in livestock husbandry.

645 If the games being developed and/or used are intended to be used as 'virtual laboratories', researchers  
646 should consider carefully whether the levels of both realism and engagingness that we expect farming  
647 audiences to demand of this medium are achievable before initiating the project. A bigger budget,  
648 resources, experience and closer engagement with farmers, stockpeople and farm vets will certainly  
649 help to tap the full potential of games in this context - though balancing realism and engagement is  
650 still likely to be a challenge when using this medium with this audience. One approach that might prove  
651 a particularly fruitful avenue for exploration in this regard is to build on existing games, rather than  
652 creating games anew. This was the ethos of a recent study that demonstrated the educational value  
653 of games in learning natural history by using the professionally-developed video game Red Dead  
654 Redemption 2, leveraging its established popularity, realism and entertainment value to engage

655 participants whilst saving time and resources (Crowley, Silk, and Crowley 2021). The hyper-real  
656 popular video game Farming Simulator - which is already played by farmers (Lane 2018) - might serve  
657 a similar role in future studies of games in agriculture. Indeed, Pavlenko et al. (2021) have already  
658 had some success building a 'mod' (a 'modification' - new game content/software created by someone  
659 other than the primary game development team) for this game to encourage the adoption of precision  
660 agriculture technologies. Alternatively, future projects might do better to use real-life imagery rather  
661 than 2/3D models to simulate agricultural environments; this ethos is already being successfully  
662 deployed by the '3D farms' project centered around virtual reality to overcome logistically and  
663 accessibility challenges in agricultural training (Barber 2016).

664 If games are intended to be used more broadly as tools to facilitate discussion between researchers  
665 and stakeholders, researchers should be less tied to realism and be more open to letting the game  
666 develop organically in close consultation with stakeholders. The game development process itself may  
667 facilitate knowledge exchange more than end product, as evidenced by the insights on real-life  
668 lameness recognition practices gained through participants telling us what our game was missing, for  
669 example. This is something that should be explored in a more dedicated way in future studies using  
670 games to engage with farmers on aspects of livestock husbandry.

## 671 **Conclusions**

672 The use of games in agricultural research has been increasing in recent years and here, we attempted  
673 to develop and use a game to support the study of lameness recognition in UK sheep farmers. We  
674 found that besides the positive effects of the game in supporting understanding, knowledge exchange  
675 and reflection of lameness, difficulties engaging the agricultural audience limited the potential of the  
676 game for education and research. In particular, experienced livestock farmers, stockpeople and  
677 veterinarians requested much higher levels of realism and engagingness than could be achieved with  
678 the limited project budget and time-frame.

679 These results suggest that more needs to be done to establish whether games can be a cost-effective  
680 tool in livestock health education and research, and to explore the most effective ways and scenarios  
681 in which to use them. Future similar studies should seek to obtain larger budgets, build on existing  
682 agricultural simulation games, and work more directly with their target audience, in order to develop  
683 games that can more acutely address the challenges of managing livestock health in the twenty-first  
684 century.

## 685 **Acknowledgements**

686 We would like to thank to all the farmers, veterinarians, academics and others who participated in the  
687 human-centered design, piloting and evaluation process to create these game and execute this study.  
688 Thank you to our advisory board who helped shape the game, animations, and study design. Thank  
689 you to the Health and Environment Public Engagement Group at University of Exeter's European  
690 Centre for Environment and Human Health, who acted as test participants before the formal roll-out  
691 of the online study. Thank you to ethics and press office staff at the University of Exeter for enabling  
692 the study to meet ethical guidelines and advertising the study in order to recruit participants. Finally,  
693 many thanks to the 63 participants who gave their time to take part in the online evaluation study,  
694 whose data forms the basis of this paper. The last author would also like to acknowledge the Centre  
695 for Artificial Intelligence, Robotics and Human-Machine Systems (IROHMS) operation C82092, part-  
696 funded by the European Regional Development Fund (ERDF) through the Welsh Government. This  
697 study was funded by the GW4 Crucible Seed Funding Award Cru20\_3.

## 698 **Data availability statement**

699 The anonymous data collected during the online evaluation study (the results of which are reported in  
700 this paper) are freely available in raw (direct output from MS Forms platform) and formatted (tidied  
701 using R code) formats at [INSERT OPEN SCIENCE FRAMEWORK LINK UPON ACCEPTANCE OF  
702 MS] and the lead author's Github repository (<https://github.com/befriendabacterium/lamenessgame>).  
703 R code to reproduce the analysis and figures reported in the manuscript is also deposited here. The  
704 Supplementary Materials of the manuscript also contain the thematic analysis of the open-form  
705 feedback in a more accessible Word document format. All participants approved the open publication  
706 of these anonymous data when signing the consent form to participate in the study.

707

708 **Supplementary Material**  
709

## 710 Supplementary Material 1: Development of the Game

711 The game was developed using a human-centered design process that began in June 2020, when  
712 our interdisciplinary group of researchers (with expertise in microbiology, engineering, social science,  
713 and human-computer interaction) started a small project (with a budget of £5000) to initially explore  
714 the potential use of game-based approaches in the context of antibiotic use practices in livestock  
715 production (M. Jones et al. 2020). There were three main phases of development.

### 716 *Phase 1: Gathering initial requirements and responses to early ideas about a game about antibiotic* 717 *use in livestock production*

718 During the initial requirement gathering stage, we conducted interviews with 3 farmers (2 cattle/sheep,  
719 1 pig) and 1 farm vet recruited through the JustFarmers platform (A. Jones 2022). Interviews were  
720 ethically approved by Cardiff University School of Informatics Ethics Committee, and comprised two  
721 parts - a first part of the interview attempting to understand the participant's experiences and  
722 challenges managing disease in livestock production including the current use of antibiotic in livestock  
723 production, and a second part in which we started to explore the design space using iterative  
724 prototyping to visualise and communicate two early prototypes (Supplementary Figure 1A) to explore  
725 their possibilities, and limitations (Lim, Stolterman, and Tenenberg 2008), as well as to provoke  
726 discussions and look for alternative ideas (Fallman 2008). The first design exploration was a wireframe  
727 of a simple game intended to communicate the balance between disease prevention and antibiotic  
728 stewardship on the farm (prototype 1a). The second design exploration was a slightly higher fidelity  
729 wireframe of a game in which players have to judge which animals to treat with antibiotics by selecting  
730 animals and assessing their list of symptoms provided as a journal entry (prototype 1b). These  
731 wireframes were demonstrated to the 4 interviewees in online meetings, in order to broadly introduce  
732 the concept of a game centered around appropriately treating sick animals with antibiotics; to stimulate  
733 discussion with farmers about whether such games might be useful for education (farmers were shown  
734 the wireframes via screenshare and asked for their thoughts); and to act as conversation-starters.  
735 Participants discussed the early prototypes and provided their feedback on their utility.

736 The interviews and feedback sessions around the prototypes with farmers and vets were recorded  
737 and thematically analyzed to identify major themes and ideas to inform the game's development  
738 (Braun and Clarke 2006). One of the major findings was that farmers felt that in seeking to make a  
739 game to support the reduction of antibiotic use in livestock farming, an explicit emphasis on antibiotic  
740 use practices was not necessary. Interviews consistently indicated that antibiotic use practices in  
741 livestock production are underpinned by stockpersonship in animal health management and the  
742 farmer's challenges and ability to early recognize animal behavioral signs and physical characteristics  
743 of sick animals. Regarding the first version of the prototype, participants highlighted the importance of  
744 the realism of the game in relation to the natural surroundings of the farm and the animals. In addition,  
745 participants highlighted how unrealistic visual elements (cartoonish looking; Supplementary Figure 1)  
746 of the prototype can be distracting. Overall, participants suggested that a fruitful avenue to pursue  
747 would be to develop game with a realistic-feel that served as a stockpersonship training tool,  
748 expressing the sentiment that being able to spot disease early was more critical and challenging than  
749 knowing how to treat it.

### 750 *Phase 2: Development of first playable prototype (Where's Woolly?)*

751 Building on the findings of the first phase, in the second phase we focused on developing a more  
752 higher-fidelity prototype game focusing on stockpersonship within a sheep farming context (given that  
753 the stakeholders we were engaging had shared experience working with sheep). The game was  
754 loosely intended to support antibiotic stewardship in agriculture by providing an environment for  
755 testing, honing and studying farmers' ability to recognise the early signs of ill health in their livestock -  
756 though we remained open to other potential uses of the game throughout our evaluation process.

757 The prototype we developed (prototype 2) was a game in which players were presented with three  
758 scenarios of identifying sick sheep in a flock e.g. identifying animals that were walking slower than  
759 other animals, or standing apart from the flock, or not eating (Supplementary Figure 1B). Scenarios  
760 were helpful to illustrate the potential and future use of the game as well as to gather feedback and  
761 identify potential problems (Bødker 2000). To add more realism to the game, this prototype was  
762 created using the Unity development platform (Unity Technologies 2021) that facilitated the creation  
763 of a 3D virtual environment containing more details such as a grassy terrain, bushes, trees, and more  
764 realistic models of the animals (in this case we used an existing sheep model ('asset') considering the  
765 previous feedback). Seven participants including a sheep/cattle farmer, a veterinary microbiologist, 2  
766 healthcare academics from our networks and 3 of our own team members were asked to play and  
767 provide feedback via a Likert Scale questionnaire to explore initial playability of the game, adapted  
768 from the MEEGA+ method (Petri, Gresse von Wangenheim, and Borgatto 2017), and a short usability  
769 questionnaire focussed on identifying in-game bugs and gathering technical suggestions for  
770 improvements. Healthcare academics from our networks and our own team members obviously could  
771 not offer a perspective on the game based on real-life farming experience and were more subject to  
772 bias in their evaluation, which probably limited this evaluation. However, given the goal of  
773 understanding the potential playability of the game and identifying technical issues and fixes, this was  
774 less of a concern at this stage.

775 No formal qualitative analysis was conducted on these data due to the brevity of the information  
776 provided. Briefly though, participants provided positive comments about the game's potential for  
777 training and research but also highlighted the need for the game to be more realistic. For example,  
778 participants suggested that we seek to include in the game more sheep showing subtle symptoms  
779 and provide feedback on whether the animal was treated correctly. Participants also suggested that  
780 we include an introduction screen to explain the different roles and game actions to the players as well  
781 as different camera angles. Overall, participants recognised the game's potential to improve livestock  
782 health management, especially as an educational tool for inexperienced farmers.

### 783 *Phase 3: Development of final prototype (The Lameness game)*

784 Building on the results of Phases 1 and 2, we chose to develop a game focused on lameness  
785 recognition in sheep farmers (Supplementary Figure 1C). Lameness was chosen as the theme of the  
786 final prototype not only because it provided a focal point for developing a more realistic game, but  
787 because it was closely intertwined with stockpersonship, resonated with many of the (mainly sheep  
788 and cattle) farmers and vets we consulted, and is a key challenge in UK livestock farming with wide-  
789 ranging implications for productivity, welfare and antibiotic stewardship.

790 For the development of the final prototype that was evaluated in this study, we first enrolled an  
791 animator (TL) with experience with scientific animation to work with our game programmer (OM),  
792 focusing on developing a realistic animation of lame and non-lame sheep which could form the basis  
793 of a game to test farmers' lameness recognition skills. This was done through a mix of consulting  
794 scientific source materials, written and video, mainly from Kaler and Green (2008), scientific experts  
795 and producing our own reference material (co-author HV filming her own sheep). This information was  
796 used to modify an existing 3D sheep model and its animations purchased from the Unity Assets store  
797 (Red Deer 2020), which was then integrated into the game. We created an expert advisory panel of  
798 farmers and sheep lameness academics, including some of the co-authors. The first author conducted  
799 a one-hour focus group to consult with stakeholders and receive feedback on the animation,  
800 aesthetics, gameplay mechanisms and future refinements. Notes were taken during the consultation  
801 sessions with stakeholders, which informed the development of the game (though no formal thematic  
802 analysis was conducted due to time and resource constraints). Feedback from the advisory panel  
803 emphasized the need to improve the sheep gait animations, which we responded to by investing more  
804 time and resources into animation refinement and their smooth integration into the game.

805 **Supplementary Material 2: Questionnaire**

806 **Consent**

807 1. By checking this box I confirm that I have understood and agree with all of the above  
808 statements and I consent to taking part in this project. You must tick this box to agree  
809 with all of the above statements, in order to part in the questionnaire.

810 **Game Results**

811 You will need to record your game time & scores after playing the game so please read the instructions  
812 below carefully before playing:

813 **STUDY INSTRUCTIONS:**

814 1. Go to <https://wheres-woolly.itch.io/lameness-game>, leaving this form open

815 2. Play the tutorial, the afterwards play the Game itself

816 3. Upon finishing the game **DO NOT CLOSE THE WEBPAGE** - you will be shown your scores (an  
817 example screenshot is shown above) - keep it open and enter your scores in the form below, then  
818 continue with the rest of the questionnaire.

819 **REMINDER - GAME RECOMMENDATIONS:**

820 - Desktop or laptop computer - The game should not be played on touchscreen devices  
821 (i.e. smartphone or tablet).

822 - Mouse with a scroll wheel or a laptop trackpad - to ensure efficient game-play.

823 - We recommend playing the game in one of the following web-browsers: Microsoft Edge, Google  
824 Chrome or Mozilla Firefox (other browsers are not supported)

825 - If the game is running slowly, try closing unused web-browser tabs (not this one)

826 \_\_\_\_\_  
827 2. Time remaining on clock when you ended the game by clicking 'Done' (in the format nnn  
828 seconds e.g. 596 seconds in the example screenshot).

829 3. Lame sheep identified (%) - e.g. 0 in the example screenshot

830 4. accuracy (%) - e.g. 0 in the example screenshot

831 5. How many times did you play the game before getting these results (0 = it was my first time  
832 playing)?

833 6. Did you play the tutorial before playing the game?

834 • Yes, and observed the sheep walking

835 • Yes, but didn't observe the sheep walking

836 • No

837 7. What computer hardware did you use to play the game? (select all those appropriate)



- 838 • Laptop or Desktop computer
- 839 • Mouse with scroll-wheel
- 840 • Track-pad with pinch zoom
- 841 • Smartphone or tablet
- 842 • Other
- 843 8. Did you experience any problems using the controls or playing the game?
- 844 • Yes
- 845 • No
- 846 9. If yes, please specify
- 847 **Game Strategy**
- 848 10. What was your strategy for observing the sheep (tick all that apply)?
- 849 [Data plotted in Figure 5C]
- 850 • Observed the whole flock and then zoomed in when I saw one that looked lame
- 851 [Denoted as 'Zoomer' in Figure 5C]
- 852 • Observed each sheep up-close until I could see whether or not it had a sign, then moved onto
- 853 the next sheep
- 854 [Denoted as 'Up-close' in Figure 5C]
- 855 • Other (please provide details below)
- 856 [Denoted as 'Other' in Figure 5C]
- 857 10. Please provide brief details about your strategy for observing the sheep?
- 858 11. How did you move from sheep to sheep (tick one)?
- 859 [Data plotted in Figure 5D]
- 860 • Randomly
- 861 [Denoted as 'Randomly' in Figure 5D]
- 862 • Semi-randomly
- 863 [Denoted as 'Semi-randomly' in Figure 5D]
- 864 • Started at one end of the flock and worked my way to the other
- 865 [Denoted as 'Linear' in Figure 5D]
- 866 • Other (please provide details below)
- 867 [Denoted as 'Other' in Figure 5D]

- 868 12. Please provide brief details about how you moved from sheep to sheep
- 869 13. What signs did you look for to find the lame sheep (tick all that apply)
- 870 • Uneven posture
- 871 • Shortened stride on one leg when walking
- 872 • Pair of legs which were moving at different speeds
- 873 • Nodding of head
- 874 • Not weight bearing on affected leg when standing
- 875 • Not weight bearing on affected leg when walking
- 876 • Reluctance to move
- 877 • Slower walking pace
- 878 • Other
- 879 14. If you answered 'Other', please provide brief details about what signs you looked for to find  
880 lame sheep
- 881 **Real-world experience**
- 882 15. Have you ever worked in farming or a related field (e.g. farm vet)?
- 883 • Yes
- 884 • No
- 885 16. How many years have you worked with sheep?
- 886 17. In what roles, if any, did you work with sheep (e.g. farmer, stockman/woman/person,  
887 veterinarian)?
- 888 • Farmer
- 889 • Stockman/woman/person
- 890 • Veterinarian
- 891 • Other
- 892 18. If you answered 'Other', please provide some brief details about the role(s) in which you  
893 worked with sheep
- 894 19. What do you think was the average level of lameness in the flock(s) with which you  
895 worked/work, over one year?
- 896 • Under 2%
- 897 • Between 2 and 5%
- 898 • Between 5 and 10%

899 • Over 10%

900 **Game Feedback**

901 Please fill in the table below with an indicating how strongly you agree with the preceding statement  
902 with 5 being strongly agree and 1 being strongly disagree

903 How strongly do you agree with the following statements?

- 904 1. The game is a realistic representation of recognising sheep lameness in the field
- 905 2. Learning to play this game was easy
- 906 3. The game rules are clear and easy to understand
- 907 4. The contents and structure helped me to become confident that I would learn with this game
- 908 5. This game is appropriately challenging for me
- 909 6. The game does not become monotonous as it progresses
- 910 7. I am motivated to achieve a better score
- 911 8. Completing the game tasks gave me a satisfying feeling of accomplishment
- 912 9. It is due to my personal effort that I managed to advance in the game
- 913 10. I feel satisfied with the things that I learned from the game
- 914 11. I would recommend this game to my colleagues/friends
- 915 12. I had fun with the game
- 916 13. I would play this game again
- 917 14. I would recommend this game as a form of entertainment
- 918 15. I achieved the goals of the game applying my knowledge
- 919 16. I would recommend this game as a form of training/educational tool
- 920 17. I was so involved in my gaming task that I lost track of time
- 921 18. I forgot about my immediate surroundings while playing this game
- 922 19. The game contents are relevant to my interests
- 923 20. It is clear to me how the contents of the game are related to my profession

924

925 Supplementary Material 3: Thematic analysis results

926 **List of comments for qualitative analysis (note the typing errors from the original, should mark**  
927 **as [cic] if quoting in text)**

928 Participant 8: If there was a way to make each sheep move, that would really help to keep  
929 engagement, I got bored waiting for the sheep to move unfortunately.

930 Participant 15: :) [Happy face]

931 Participant 17: I think most farmers would say that they also assess lameness by making the sheep  
932 walk / move away from them rather than just wait until they walk.

933 Participant 18: If you wanted to complete the game in a shorter time, you would want the sheep to  
934 move around more. I got bored waiting for them to walk. Needs a dog to run round them!

935 Participant 19: Game animations were not smooth, making the distinction between a normal walking  
936 gait and a limp less easy to discern. This scenario may not be very representative, as in my experience  
937 lameness is not often identified when animals are static in the field, more often when animals are  
938 being moved or handled.

939 Participant 22: Lamé sheep aren't always that easy to spot in a field

940 Participant 24: Would be good to get sheep to move, maybe by walking a person around so they walk  
941 away from you as it is difficult to assess them systematically. .

942 Participant 27: i got annoyed waiting for the sheep to move. in a flock i would walk around them and  
943 the sheep would move.

944 Participant 34: The graphics werent very clear - it was hard to see if they were holding a leg slightly  
945 up. In reality you would move the sheep to look for lameness

946 Participant 35: I would have enjoyed this game better if the controls worked better . the sheep  
947 animations are good, but to a trained eye i found them confusing , eg none of them stood grazing in a  
948 normal posture because they were all jiggling their legs all the time

949 Participant 36: This sort of game doesn't appeal to me I'm afraid. I've always worked in the real world.

950 Participant 38: none [Cannot include in the analysis]

951 Participant 43: it was entertaiing but i felt there could be improvements made as you chose the right  
952 animals maybe a sound so you know your going the right way or a counter in the corner

953 Participant 44: took a long while for the seep to start moving in the tutorial that i wondered if it was  
954 going to move, but I think that's the point of the questions asking about if I watched the sheep move.  
955 i enjoyed the game as it allowed me to get a better sense of my knowledge and skills. it mimicked  
956 sheep well but was sometimes difficult to tell if a normal movement of sheep we a game lag.

957 Participant 50: I thought lameness was really realistic- but was expecting more variation (ie from very  
958 early to very severe, different legs, etc - though maybe I didn't spot that!)

959 Participant 51: Found it very frustrating. Not realistic. Movement stilted which made identifying slightly  
960 lame sheep virtually impossible. Most of the time all sheep standing still, leading to frustration with the  
961 game and rushing.

962 Participant 57: I thought this was brilliant. It was a bit frustrating not to be able to mark non-lame sheep  
963 when surveying, but that is more realistic and requires strategy. The main issue was the unrealistic

964 movement of the feet on the ground whilst standing. On my PC there was a foot slide effect. I didn't  
965 look for standing signs as I thought they were more graphics errors

966 Participant 67: Could be enhanced by slightly more realistic depiction of sheep movement for non-  
967 lame sheep

968 Participant 68: It's interesting to be looking for sign in virtual sheep, but I got frustrated that I was not  
969 able to make them move as would be the case in real life.

970 Participant 70: very basic. would be nice to have a method of encouraging sheep to move. In real life  
971 I would walk around the flock and observe they way the moved. In this game the sheep were fairly  
972 stationary which made that hard.

973 **First reviewer's (M.S.B) comments on second reviewer's (N.V.D) analysis and points of**  
974 **difference**

975 The two analyses presented are compatible to a large extent and reflect far more commonalities than  
976 fundamental points of difference. Where there were discrepancies, these reflected different  
977 professional backgrounds and differential prioritisation of aspects of the dataset, especially relating to  
978 technical versus experiential aspects.

979 M.S.B. identified 4 themes:

- 980 1. Challenges of identifying lameness
- 981 2. Psychological responses
- 982 3. Realism of farming simulation
- 983 4. Technical performance

984 N.V.D. identified 5 themes

- 985 1. Perceived Realism of the Game
- 986 2. Reflective experiences
- 987 3. Challenges of the Game simulation
- 988 4. Emotional Responses to the Game
- 989 5. Participant's suggestions for improvements

990 I consider that N.V.D has captured the content of my themes, with the following comments.

991 M.S.B. opted to sort the themes alphabetically. N.V.D. has not stated a logic for ordering the themes.  
992 I would prefer to retain alphabetical ordering (unless a strong rationale to the contrary is provided).

993 I would prefer to retain the theme title 'Psychological responses' rather than 'Emotional responses',  
994 but am happy to add 'to the game'. I consider that the term 'Psychological' better captures the range  
995 of sub-themes.

996 I consider the only amendments needed to N.V.D.'s coding are to order alphabetically and to replace  
997 'emotional' by 'psychological'

998 **Results/themes identified**

- 999 1. Perceived realism of the game (PR)

- 1000 o Quote 1: “the sheep animations are good” (Participant 35)
- 1001 o Quote 2: “it mimicked sheep well” (Participant 44)
- 1002 o Quote 3: “I thought lameness was really realistic...” (Participant 50)
- 1003 o Quote 4: “Not realistic.” (Participant 51)
- 1004 o Quote 5: “The main issue was the unrealistic movement of the feet on the ground whilst standing”  
1005 (Participant 57)
- 1006 2. Technical challenges playing the simulation game (TC)
- 1007 · Sub-theme 1: Lack of movement of the sheep
- 1008 o Quote 1: “: I think most farmers would say that they also assess lameness by making te sheep  
1009 walk / move away from them rather than just wait until they walk” (Participant 17)
- 1010 o Quote 2: “as in my experience lameness is not often identified when animals are static in the field,  
1011 more often when animals are being moved or handled.” (Participant 19)
- 1012 o Quote 3: “I got annoyed waiting for the sheep to move. in a flock i would walk around them and the  
1013 sheep would move.” (Participant 27)
- 1014 o Quote 4: “In reality you would move the sheep to look for lameness” (Participant 34)
- 1015 o Quote 5: “took a long while for the sheep to start moving in the tutorial that i wondered if it was  
1016 going to move, but I think that’s the point of the questions asking about if I watched the sheep move”  
1017 (Participant 44)
- 1018 o Quote 6: “Most of the time all sheep standing still, leading to frustration with the game and rushing”  
1019 (Participant 51)
- 1020 o Quote 7: “I was not able to make them move as would be the case in real life.” (Participant 68)
- 1021 · Sub-theme 2: Simple, unnatural, and confusing game simulation of sheep’s behaviour (SB)
- 1022 o Quote 1: “the sheep animations are good, but to a trained eye i found them confusing , eg none of  
1023 them stood grazing in a normal posture because they were all jiggling their legs all the time.”  
1024 (Participant 35)
- 1025 o Quote 2: “was sometimes difficult to tell if a normal movement of sheep we a game lag.” (Participant  
1026 44)
- 1027 o Quote 3: “was expecting more variation (ie from very early to very severe, different legs, etc -  
1028 though maybe I didn’t spot that!)” (Participant 50)
- 1029 o Quote 4: “Movement stilted which made identifying slightly lame sheep virtually impossible.”  
1030 (Participant 51)
- 1031 o Quote 5: “Very basic... In this game the sheep were fairly stationary which made that hard”  
1032 (Participant 70)
- 1033 · Sub-theme 3: Unable to mark non-lame sheep
- 1034 o Quote 1: “It was a bit frustrating not to be able to mark non-lame sheep when surveying, but that  
1035 is more realistic and requires strategy.” (Participant 57)

- 1036 · Sub-theme 4: Usability and Animation/simulation issues (e.g., transitions, controls, graphics)  
1037 (UA)
- 1038 o Quote 1: “Game animations were not smooth, making the distinction between a normal walking  
1039 gait and a limp less easy to discern.” (Participant 19)
- 1040 o Quote 2: “The graphics werent very clear - it was hard to see if they were holding a leg slightly up.”  
1041 (Participant 34)
- 1042 o Quote 3: “would have enjoyed this game better if the this game if the controls worked better”  
1043 (Participant 35)
- 1044 o Quote 4: “... On my PC there was a foot slide effect. I didn’t look for standing signs as I thought  
1045 they were more graphics errors” (Participant 57)
- 1046 3. Emotional responses to the game (ER)
- 1047 · Sub-theme 1: Enjoyment
- 1048 o Quote 1: “:) [Happy face]” (Participant 15)
- 1049 o Quote 2: “: it was entertaining” [Sic] (Participant 43)
- 1050 o Quote 3: “I enjoyed the game” (Participant 44)
- 1051 · Sub-theme 2: Surprise/interesting
- 1052 o Quote 1: “I thought this was brilliant” (Participant 57)
- 1053 o Quote 2: “It’s interesting to be looking for sign in virtual sheep” (Participant 68)
- 1054 · Sub-theme 3: Boredom
- 1055 o Quote 1: “I got bored waiting for the sheep to move unfortunately” (Participant 8)
- 1056 o Quote 2: “I got bored waiting for them to walk” (Participant 18)
- 1057 · Sub-theme 4: Frustration
- 1058 o Quote 1: “i got annoyed waiting for the sheep to move” [Sic] (Participant 27)
- 1059 o Quote 2: “Found it very frustrating.” (Participant 51)
- 1060 o Quote 3: “But I got frustrated.” (Participant 68)
- 1061 · Sub-theme 5: Lack of appeal
- 1062 o Quote 1: “This sort of game doesn’t appeal to me I’m afraid. I’ve always worked in the real world.”  
1063 (Participant 36)
- 1064 4. Reflective experiences
- 1065 o Quote 1: “Lame sheep aren’t always that easy to spot in a field” (Participant 22)
- 1066 o Quote 2: “in a flock i would walk around them and the sheep would move” (Participant 27)
- 1067 o Quote 3: “it allowed me to get a better sense of my knowledge and skills” (Participant 44)

- 1068 o Quote 4: “In real life I would walk around the flock and observe they way the moved” (Participant  
1069 70)
- 1070 5. Participants’ suggestions for improvements
- 1071 · Sub-theme 1: Making sheep move e.g., using additional mechanisms and characters
- 1072 o Quote 1: “If there was a way to make each sheep move, that would really help to keep engagement”  
1073 (Participant 8)
- 1074 o Quote 2: “If you wanted to complete the game in a shorter time, you would want the sheep to move  
1075 around more... Needs a dog to run round them!” (Participant 18)
- 1076 o Quote 3: “Would be good to get sheep to move, maybe by walking a person around so they walk  
1077 away from you...” (Participant 24)
- 1078 o Quote 4: “would be nice to have a method of encouraging sheep to move...” (Participant 70)
- 1079 · Sub-theme 2: Providing additional visual/sound feedback
- 1080 o Quote 1: “i felt there could be improvements made as you chose the right animals maybe a sound  
1081 so you know your going the right way or a counter in the corner...” (Participant 43)
- 1082 o Quote 2: “Could be enhanced by slightly more realistic depiction of sheep movement for non-lame  
1083 sheep” (Participant 67[JM1] )
- 1084



1085

Supplementary Material 4: Project Budget Breakdown

| <b>Expense</b>                                                                                                                                                                                                                                      | <b>Spend (£)</b> |
|-----------------------------------------------------------------------------------------------------------------------------------------------------------------------------------------------------------------------------------------------------|------------------|
| Game Developer (hired at a rate £20.55ph broken down into £18.43ph basic rate + £2.21ph holiday pay)                                                                                                                                                | 3,674            |
| 3D artist/ animator (hired at a rate £20.55ph)                                                                                                                                                                                                      | 935              |
| Digital models from the Unity Asset store that were used in the game                                                                                                                                                                                | 66               |
| Participant incentivisation (£70 gift vouchers to reimburse/thank early-phase interviewees; £40 for study questionnaire testers, £150 on 3 x £50 Chelford Farm Supplies vouchers as lottery prizes/incentives for participating in the final study) | 260              |
| Promoting the study in the National Sheep Association's newsletter                                                                                                                                                                                  | 42               |
| <b>TOTAL</b>                                                                                                                                                                                                                                        | <b>4,978</b>     |

1086

1087 Supplementary Figure 1: Description of the human-centered design process. A) NScreenshots of the  
1088 initial wireframes/prototypes 1a and 1b developed around the concept of antibiotic use in livestock  
1089 farming; B) Screenshot of prototype 2, 'Where's Woolly' in which players are challenged to identify  
1090 simple signs of illness in sheep; C) Screenshot of the animations and final game in which they were  
1091 used, which is the game evaluated in this study.

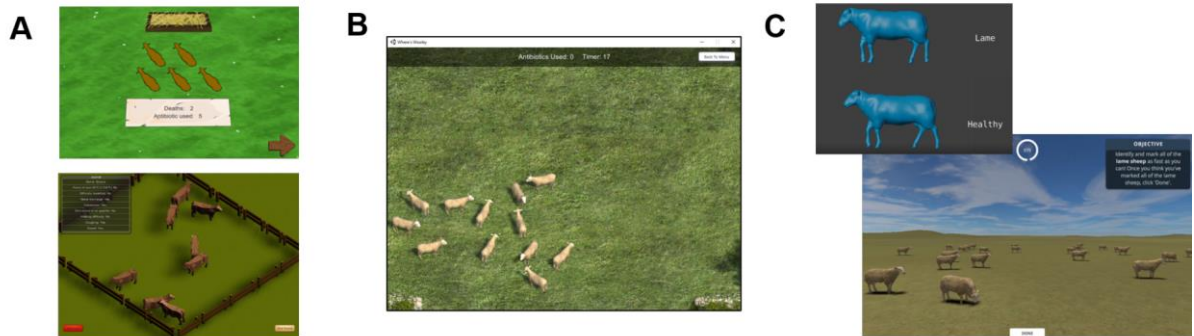

1092

1093

1094       Supplementary Figure 2: Diagnostic plots for the 'Farming Experience' model. From top left to  
1095       bottom right: Residuals vs Fitted plot showing if residuals have linear patterns (residuals should be  
1096       approximately equally spread around the horizontal red line if so); Normal Q-Q plot showing if  
1097       residuals are normally distributed (residuals should approximately follow the dashed line if so);  
1098       Scale-Location plot showing if residuals are spread equally along the ranges of the predictors  
1099       (residuals should be approximately equally spread around the horizontal red line if so); Residuals vs  
1100       Leverage plot to identify any outliers that are influential in the linear regression (Cook's distance  
1101       lines should not be visible and/or points should all be within Cook's distance lines)

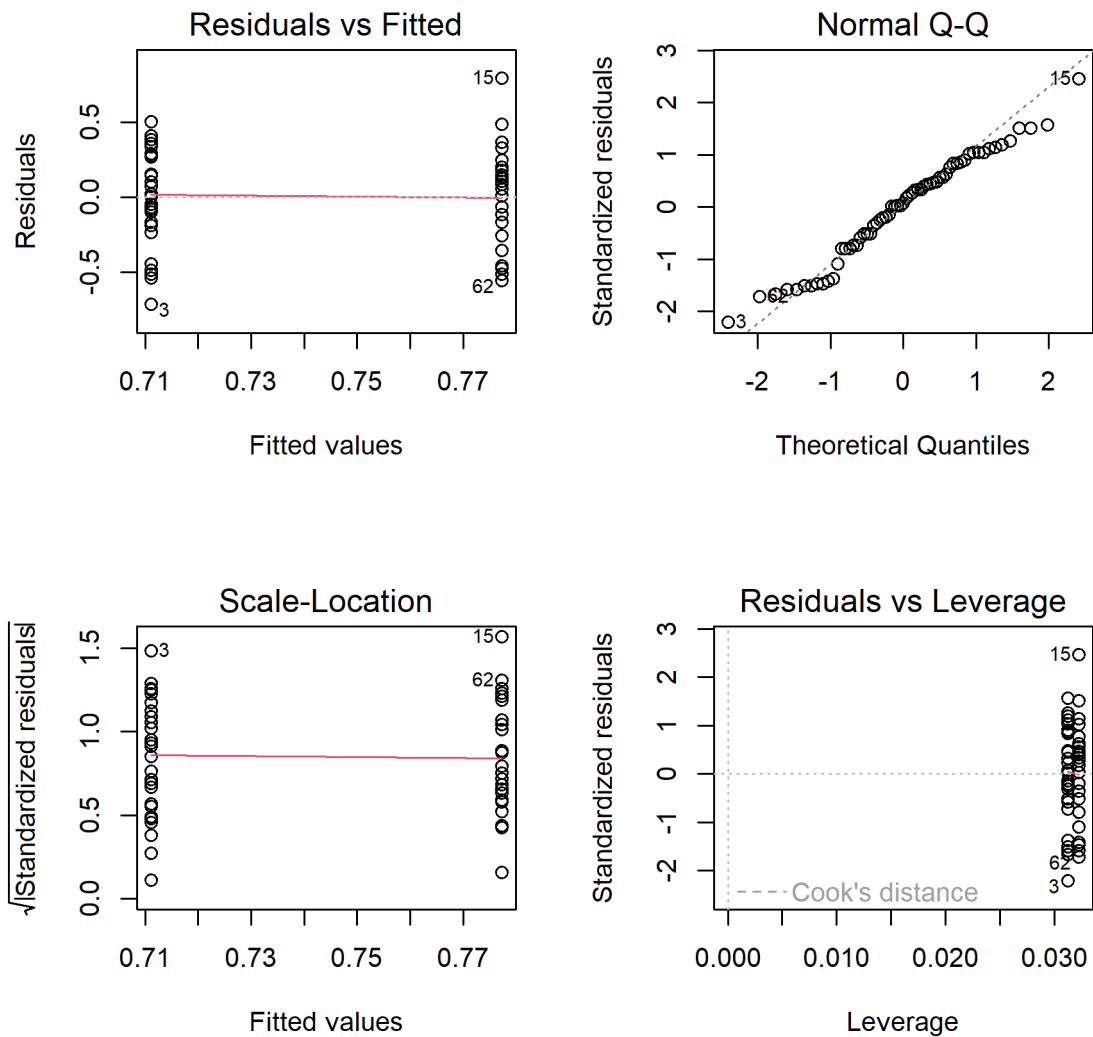

1102

1103

1104 Supplementary Figure 3: Balloon plot of contingency table used to conduct chi-squared test for a  
 1105 difference in the lameness signs looked for according to real-life farming experience. Size of the  
 1106 circles/balloons reflects the frequency of participants that looked for that lameness sign (relative to  
 1107 the total number of signs looked for by both groups)

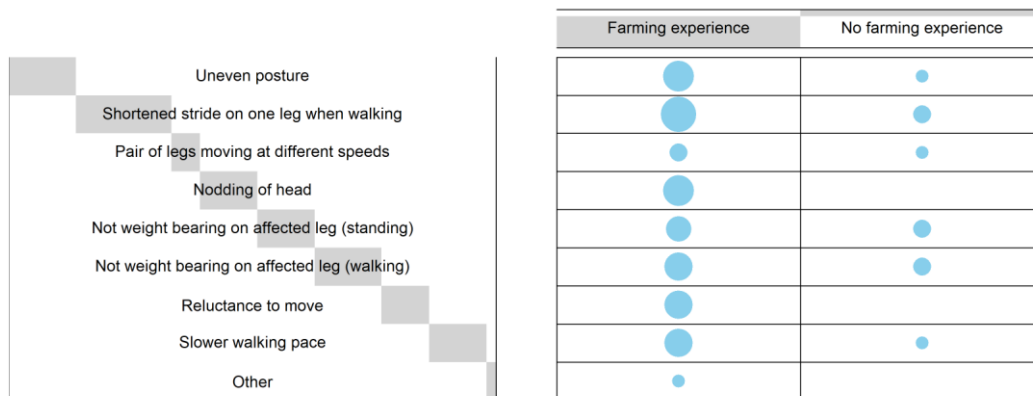

1108

1109

1110       Supplementary Figure 4: Diagnostic plots for the 'Lameness signs looked for' model A (uneven  
1111       posture) model. From top left to bottom right: Residuals vs Fitted plot showing if residuals have  
1112       linear patterns (residuals should be approximately equally spread around the horizontal red line if  
1113       so); Normal Q-Q plot showing if residuals are normally distributed (residuals should approximately  
1114       follow the dashed line if so); Scale-Location plot showing if residuals are spread equally along the  
1115       ranges of the predictors (residuals should be approximately equally spread around the horizontal red  
1116       line if so); Residuals vs Leverage plot to identify any outliers that are influential in the linear  
1117       regression (Cook's distance lines should not be visible and/or points should all be within Cook's  
1118       distance lines)

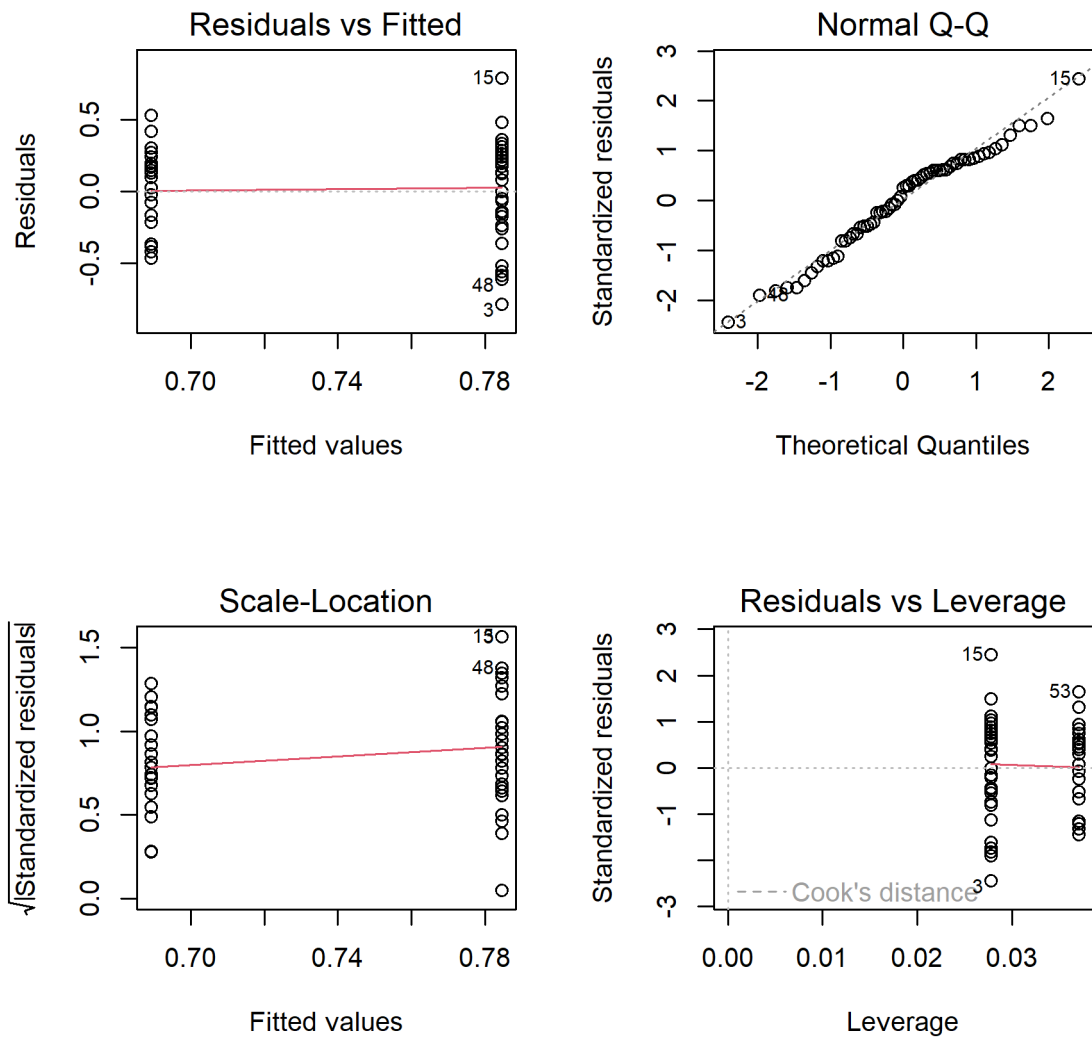

1119

1120

1121 Supplementary Figure 5: Diagnostic plots for the 'Lameness signs looked for' model B (limp) model.  
1122 From top left to bottom right: Residuals vs Fitted plot showing if residuals have linear patterns  
1123 (residuals should be approximately equally spread around the horizontal red line if so); Normal Q-Q  
1124 plot showing if residuals are normally distributed (residuals should approximately follow the dashed  
1125 line if so); Scale-Location plot showing if residuals are spread equally along the ranges of the  
1126 predictors (residuals should be approximately equally spread around the horizontal red line if so);  
1127 Residuals vs Leverage plot to identify any outliers that are influential in the linear regression (Cook's  
1128 distance lines should not be visible and/or points should all be within Cook's distance lines)

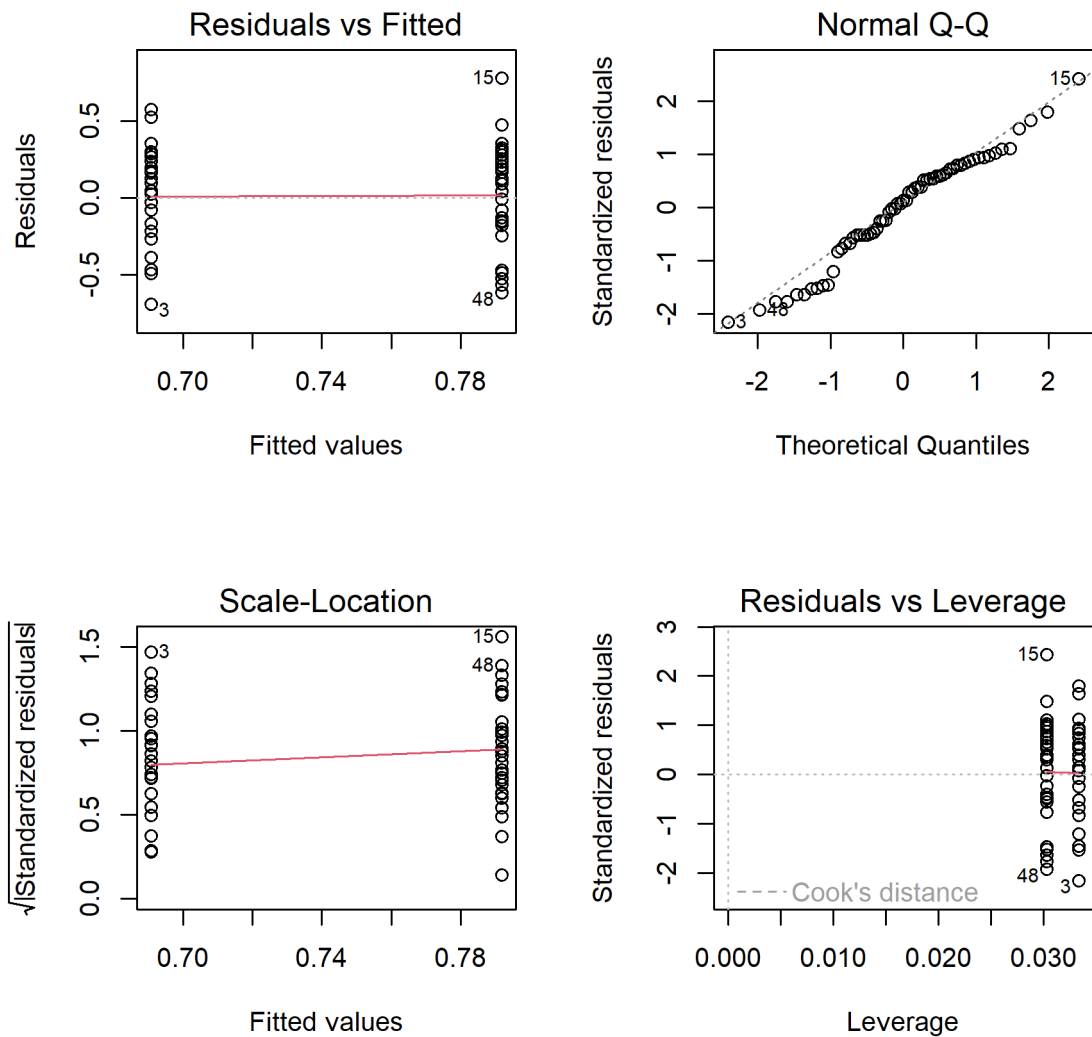

1129

1130

1131 Supplementary Figure 6: Diagnostic plots for the 'Lameness signs looked for' model C (raised leg)  
1132 model. From top left to bottom right: Residuals vs Fitted plot showing if residuals have linear  
1133 patterns (residuals should be approximately equally spread around the horizontal red line if so);  
1134 Normal Q-Q plot showing if residuals are normally distributed (residuals should approximately follow  
1135 the dashed line if so); Scale-Location plot showing if residuals are spread equally along the ranges  
1136 of the predictors (residuals should be approximately equally spread around the horizontal red line if  
1137 so); Residuals vs Leverage plot to identify any outliers that are influential in the linear regression  
1138 (Cook's distance lines should not be visible and/or points should all be within Cook's distance lines)

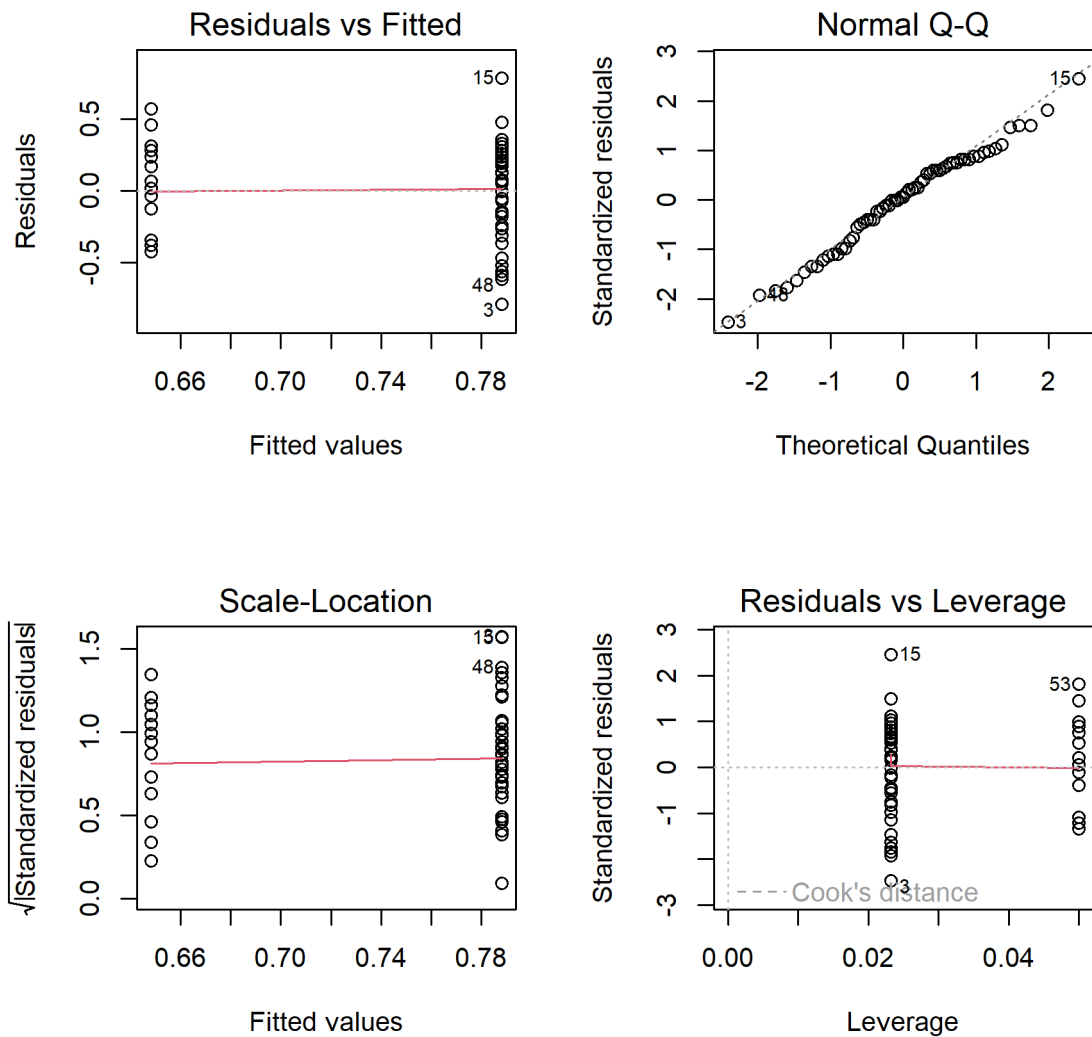

1139

1140

1141 Supplementary Figure 7: Diagnostic plots for the 'User Engagement' model. From top left to bottom  
1142 right: Residuals vs Fitted plot showing if residuals have linear patterns (residuals should be  
1143 approximately equally spread around the horizontal red line if so); Normal Q-Q plot showing if  
1144 residuals are normally distributed (residuals should approximately follow the dashed line if so);  
1145 Scale-Location plot showing if residuals are spread equally along the ranges of the predictors  
1146 (residuals should be approximately equally spread around the horizontal red line if so); Residuals vs  
1147 Leverage plot to identify any outliers that are influential in the linear regression (Cook's distance  
1148 lines should not be visible and/or points should all be within Cook's distance lines)

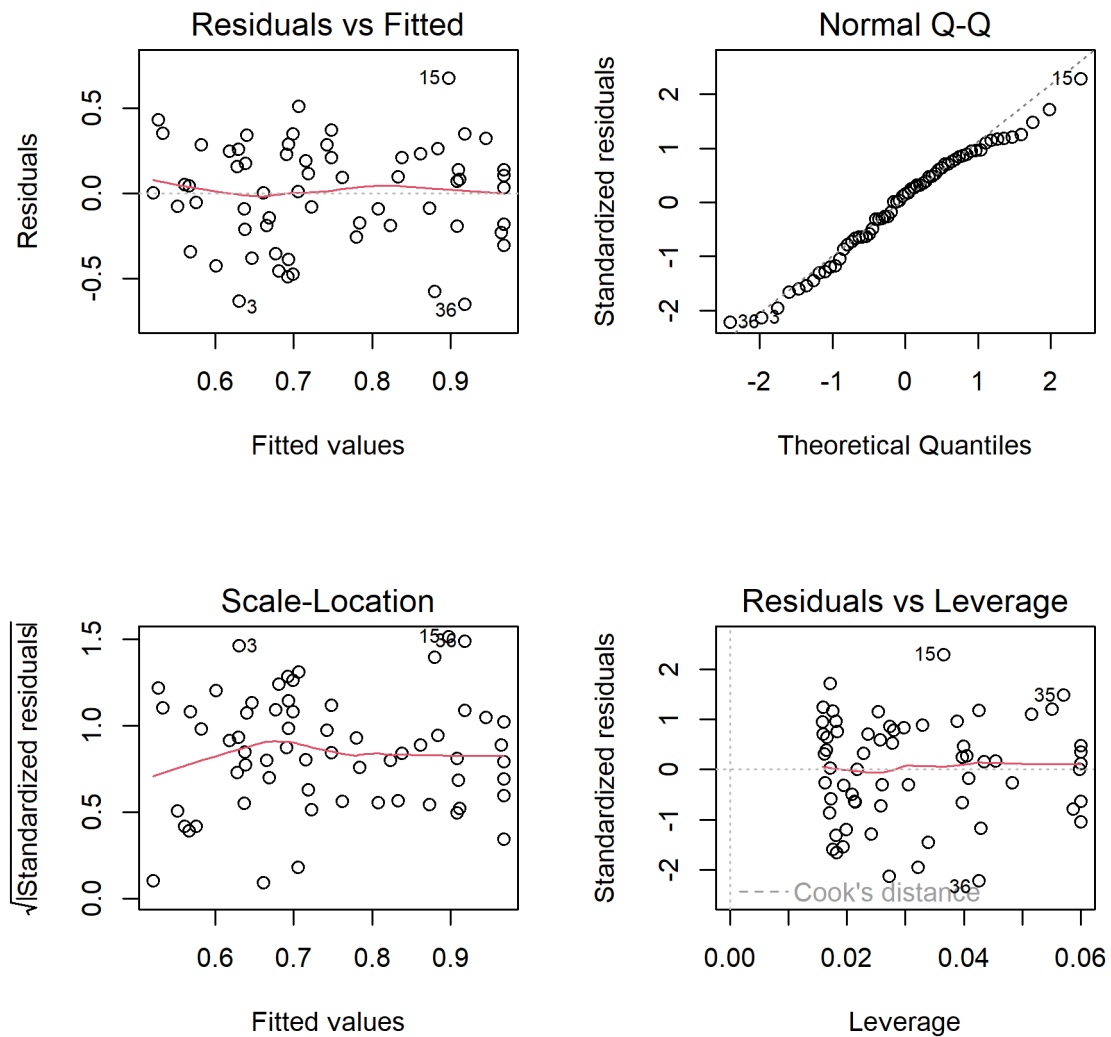

1149

1150



## 1151 **References**

- 1152 Barber, Stuart. 2016. *Development of 4D Farms to Improve Student Learning and Safety: Final Report*  
1153 2016.
- 1154 Berthet, Elsa T. A., Cécile Barnaud, Nathalie Girard, Julie Labatut, and Guillaume Martin. 2016. “How  
1155 to Foster Agroecological Innovations? A Comparison of Participatory Design Methods.” *Journal of*  
1156 *Environmental Planning and Management* 59 (2): 280–301.  
1157 <https://doi.org/10.1080/09640568.2015.1009627>.
- 1158 Best, Caroline M., Alison Z. Pyatt, Janet Roden, Malgorzata Behnke, and Kate Phillips. 2021. “Sheep  
1159 Farmers’ Attitudes Towards Lameness Control: Qualitative Exploration of Factors Affecting Adoption  
1160 of the Lameness Five-Point Plan.” *PLOS ONE* 16 (2): e0246798.  
1161 <https://doi.org/10.1371/journal.pone.0246798>.
- 1162 Best, Caroline M., Janet Roden, Alison Z. Pyatt, Malgorzata Behnke, and Kate Phillips. 2020. “Uptake  
1163 of the Lameness Five-Point Plan and Its Association with Farmer-Reported Lameness Prevalence: A  
1164 Cross-Sectional Study of 532 UK Sheep Farmers.” *Preventive Veterinary Medicine* 181 (August):  
1165 105064. <https://doi.org/10.1016/j.prevetmed.2020.105064>.
- 1166 Bicameral Studios. 2018. “Free Island Collection 3D Landscapes Unity Asset Store.”  
1167 <https://assetstore.unity.com/packages/3d/environments/landscapes/free-island-collection-104753>.
- 1168 Blender Foundation. 2021. “Blender.” <https://www.blender.org/>.
- 1169 Bødker, S. 2000. “Scenarios in User-Centred Design—Setting the Stage for Reflection and Action.”  
1170 *Interacting with Computers* 13 (1): 61–75. [https://doi.org/10.1016/S0953-5438\(00\)00024-2](https://doi.org/10.1016/S0953-5438(00)00024-2).
- 1171 Braun, Virginia, and Victoria Clarke. 2006. “Using Thematic Analysis in Psychology.” *Qualitative*  
1172 *Research in Psychology* 3 (2): 77–101. <https://doi.org/10.1191/1478088706qp063oa>.
- 1173 Braun, Virginia, and Victoria Clarke. 2006. 2021a. “Can I Use TA? Should I Use TA? Should I Not Use  
1174 TA? Comparing Reflexive Thematic Analysis and Other Pattern-Based Qualitative Analytic  
1175 Approaches.” *Counselling and Psychotherapy Research* 21 (1): 37–47.  
1176 <https://doi.org/10.1002/capr.12360>.
- 1177 Braun, Virginia, and Victoria Clarke. 2006. 2021b. *Thematic Analysis: A Practical Guide*. SAGE  
1178 Publications Ltd. <https://uk.sagepub.com/en-gb/eur/thematic-analysis/book248481>.
- 1179 Bueno, L., and Y. Ruckebusch. 1979. “Ingestive Behaviour in Sheep Under Field Conditions.” *Applied*  
1180 *Animal Ethology* 5 (2): 179–87. [https://doi.org/10.1016/0304-3762\(79\)90089-0](https://doi.org/10.1016/0304-3762(79)90089-0).
- 1181 Champely, Stephane, Claus Ekstrom, Peter Dalgaard, Jeffrey Gill, Stephan Weibelzahl, Aditya  
1182 Anandkumar, Clay Ford, Robert Volcic, and Helios De Rosario. 2020. *Pwr: Basic Functions for Power*  
1183 *Analysis*. <https://CRAN.R-project.org/package=pwr>.
- 1184 Cohen, Jacob. 1977. *Statistical Power Analysis for the Behavioral Sciences*. Academic Press.
- 1185 Crowley, Edward J., Matthew J. Silk, and Sarah L. Crowley. 2021. “The Educational Value of Virtual  
1186 Ecologies in Red Dead Redemption 2.” *People and Nature* n/a (n/a).  
1187 <https://doi.org/10.1002/pan3.10242>.
- 1188 Davies, Peers, John G Remnant, Martin J Green, Emily Gascoigne, Nick Gibbon, Robert Hyde, Jack  
1189 R Porteous, Kiera Schubert, Fiona Lovatt, and Alexander Corbishley. 2017. “Quantitative Analysis of

- 1190 Antibiotic Usage in British Sheep Flocks.” *Veterinary Record* 181 (19): 511–11.  
1191 <https://doi.org/10.1136/vr.104501>.
- 1192 Eklund, Aron, and James Trimble. 2021. *Beeswarm: The Bee Swarm Plot, an Alternative to Stripchart*.  
1193 <https://CRAN.R-project.org/package=beeswarm>.
- 1194 Fallman, Daniel. 2008. “The Interaction Design Research Triangle of Design Practice, Design Studies,  
1195 and Design Exploration.” *Design Issues* 24 (3): 4–18. <https://www.jstor.org/stable/25224179>.
- 1196 FAWC. 2011. “FAWC Opinion on Sheep Lameness.”  
1197 <https://www.gov.uk/government/publications/fawc-opinion-on-sheep-lameness>.
- 1198 Fountas, Spyros, Tsiropoulos, Zisis, Stamatelopoulos, Panagiotis, Anastasiou, Evangelos,  
1199 Hutzenlaub, Tim, Radišić, Mladen, Minic, Vladan, and Rau, Patrick. 2019. “A Serious Video Game for  
1200 Smart Farming Technologies.” In *Digitizing Agriculture Conference Proceedings*. S. l.: s. n.  
1201 [https://efita-org.eu/wp-content/uploads/2020/03/EFITA\\_Proceedings\\_e-book.pdf](https://efita-org.eu/wp-content/uploads/2020/03/EFITA_Proceedings_e-book.pdf).
- 1202 GATES. 2019. “Gates Smart Farming.” Text. *Gates Smart Farming*. <https://www.gates-game.eu/en>.
- 1203 Green, Laura, and Rachel Clifton. 2018. “Diagnosing and Managing Footrot in Sheep: An Update.” *In*  
1204 *Practice* 40 (1): 17–26. <https://doi.org/10.1136/inp.j4575>.
- 1205 Hanington, Bruce. 2017. “Empathy, Values, and Situated Action: Sustaining People and Planet  
1206 Through Human Centered Design.” In *Routledge Handbook of Sustainable Design*, 1st ed. Routledge.  
1207 [https://www.taylorfrancis.com/chapters/edit/10.4324/9781315625508-19/empathy-values-situated-](https://www.taylorfrancis.com/chapters/edit/10.4324/9781315625508-19/empathy-values-situated-action-bruce-hanington)  
1208 [action-bruce-hanington](https://www.taylorfrancis.com/chapters/edit/10.4324/9781315625508-19/empathy-values-situated-action-bruce-hanington).
- 1209 Hernandez-Aguilera, J. Nicolas, Max Mauerman, Alexandra Herrera, Kathryn Vasilaky, Walter  
1210 Baethgen, Ana Maria Loboguerrero, Rahel Diro, Yohana Tesfamariam Tekeste, and Daniel Osgood.  
1211 2020. “Games and Fieldwork in Agriculture: A Systematic Review of the 21st Century in Economics  
1212 and Social Science.” *Games* 11 (4): 47. <https://doi.org/10.3390/g11040047>.
- 1213 Jones, Anna. 2022. “Just Farmers.” <https://www.justfarmers.org/>.
- 1214 Jones, Matt, Hughes, Robert, Murray, Aimee, Verdezoto, Nervo and Barnish, Maxwell. 2020.  
1215 “Exploring Antibiotic Use Practices in Livestock Production Through a Novel, Game-Based Approach.”  
1216 [https://gw4.ac.uk/exploring-antibiotic-use-practices-in-livestock-production-through-a-novel-game-](https://gw4.ac.uk/exploring-antibiotic-use-practices-in-livestock-production-through-a-novel-game-based-approach/)  
1217 [based-approach/](https://gw4.ac.uk/exploring-antibiotic-use-practices-in-livestock-production-through-a-novel-game-based-approach/).
- 1218 Kaler, Jasmeet, and T. R. N. George. 2011. “Why Are Sheep Lame? Temporal Associations Between  
1219 Severity of Foot Lesions and Severity of Lameness in 60 Sheep.” *Animal Welfare* 20: 1.
- 1220 Kaler, Jasmeet, and Laura Green. 2008. “Recognition of Lameness and Decisions to Catch for  
1221 Inspection Among Sheep Farmers and Specialists in GB.” *BMC Veterinary Research* 4 (1): 41.  
1222 <https://doi.org/10.1186/1746-6148-4-41>.
- 1223 Kaler, Jasmeet, Jurgen Mitsch, Jorge A. Vázquez-Diosdado, Nicola Bollard, Tania Dottorini, and Keith  
1224 A. Ellis. 2019. “Automated Detection of Lameness in Sheep Using Machine Learning Approaches:  
1225 Novel Insights into Behavioural Differences Among Lame and Non-Lame Sheep.” *Royal Society Open*  
1226 *Science* 7 (1): 190824. <https://doi.org/10.1098/rsos.190824>.
- 1227 Komsta, Lukasz, and Frederick Novomestky. 2022. *Moments: Moments, Cumulants, Skewness,*  
1228 *Kurtosis and Related Tests*. <https://CRAN.R-project.org/package=moments>.

- 1229 Lane, Rick. 2018. "Meet the Real-Life Farmers Who Play Farming Simulator | Simulation Games | the  
1230 Guardian." [https://www.theguardian.com/games/2018/jul/24/meet-the-real-life-farmers-who-play-](https://www.theguardian.com/games/2018/jul/24/meet-the-real-life-farmers-who-play-farming-simulator)  
1231 [farming-simulator](https://www.theguardian.com/games/2018/jul/24/meet-the-real-life-farmers-who-play-farming-simulator).
- 1232 Lehtonen, Sami. 2017. "sFuture Targeting 3D Props Unity Asset Store."  
1233 <https://assetstore.unity.com/packages/3d/props/sfuture-targeting-83113>.
- 1234 Lim, Youn-Kyung, Erik Stolterman, and Josh Tenenber. 2008. "The Anatomy of Prototypes:  
1235 Prototypes as Filters, Prototypes as Manifestations of Design Ideas." *ACM Transactions on Computer-*  
1236 *Human Interaction* 15 (2): 7:1–27. <https://doi.org/10.1145/1375761.1375762>.
- 1237 Michsky. 2021. "Modern UI Pack GUI Tools Unity Asset Store."  
1238 <https://assetstore.unity.com/packages/tools/gui/modern-ui-pack-201717>.
- 1239 Monk, Andrew F. 2002. "Fun, Communication and Dependability: Extending the Concept of Usability."  
1240 In *People and Computers XVI - Memorable Yet Invisible*, edited by Kristine Faulkner, Janet Finlay,  
1241 and Françoise Détienne, 3–14. London: Springer. [https://doi.org/10.1007/978-1-4471-0105-5\\_1](https://doi.org/10.1007/978-1-4471-0105-5_1).
- 1242 Moojen, Fernanda Gomes, Paulo César de Faccio Carvalho, Davi Teixeira dos Santos, Armindo Barth  
1243 Neto, Paulo Cardozo Vieira, and Julie Ryschawy. 2022. "A Serious Game to Design Integrated Crop-  
1244 Livestock System and Facilitate Change in Mindset Toward System Thinking." *Agronomy for*  
1245 *Sustainable Development* 42 (3): 35. <https://doi.org/10.1007/s13593-022-00777-5>.
- 1246 Nalon, Elena, and Peter Stevenson. 2019. "Addressing Lameness in Farmed Animals: An Urgent  
1247 Need to Achieve Compliance with EU Animal Welfare Law." *Animals* 9 (8): 576.  
1248 <https://doi.org/10.3390/ani9080576>.
- 1249 Nieuwhof, G. J., and S. C. Bishop. 2005. "Costs of the Major Endemic Diseases of Sheep in Great  
1250 Britain and the Potential Benefits of Reduction in Disease Impact." *Animal Science* 81 (1): 23–29.  
1251 <https://doi.org/10.1079/ASC41010023>.
- 1252 Nuritha, Ifrina, Vandha Pradwiyasma Widartha, and Saiful Bukhori. 2017. "Designing Gamification on  
1253 Social Agriculture (SociAg) Application to Increase End-User Engagement." In *2017 4th International*  
1254 *Conference on Computer Applications and Information Processing (CAIPT)*, 1–5.  
1255 <https://doi.org/10.1109/CAIPT.2017.8320713>.
- 1256 Pavlenko, T., D.s. Paraforos, D. Fenrich, S., A. Murdoch, R. Tranter, Y. Gadanakis, M. Arnoult, and  
1257 T. Engel. 2021. "96. Increasing Adoption of Precision Agriculture via Gamification: The Farming  
1258 Simulator Case." In *Precision Agriculture ?21*, 803–10. Wageningen Academic Publishers.  
1259 [https://doi.org/10.3920/978-90-8686-916-9\\_96](https://doi.org/10.3920/978-90-8686-916-9_96).
- 1260 Petri, Giani, Christiane Gresse von Wangenheim, and Adriano Ferreti Borgatto. 2017. "MEEGA+,  
1261 Systematic Model to Evaluate Educational Games." In, edited by Newton Lee, 1–7. Cham: Springer  
1262 International Publishing. [https://doi.org/10.1007/978-3-319-08234-9\\_214-1](https://doi.org/10.1007/978-3-319-08234-9_214-1).
- 1263 Prosser, Naomi S., Kevin J. Purdy, and Laura E. Green. 2019. "Increase in the Flock Prevalence of  
1264 Lameness in Ewes Is Associated with a Reduction in Farmers Using Evidence-Based Management  
1265 of Prompt Treatment: A Longitudinal Observational Study of 154 English Sheep Flocks 20132015."  
1266 *Preventive Veterinary Medicine* 173 (December): 104801.  
1267 <https://doi.org/10.1016/j.prevetmed.2019.104801>.
- 1268 R Core Team. 2017. *R: A Language and Environment for Statistical Computing*. Vienna, Austria: R  
1269 Foundation for Statistical Computing. <https://www.R-project.org/>.

- 1270 Red Deer. 2020. "Sheep Realistic Characters Unity Asset Store."  
1271 <https://assetstore.unity.com/packages/3d/characters/animals/mammals/sheep-realistic-176904>.
- 1272 RStudio Team. 2020. "RStudio: Integrated Development Environment for R." Boston, MA.  
1273 <http://www.rstudio.com/>.
- 1274 Sutherland, Lee-Ann. 2020. "The 'Desk-Chair Countryside': Affect, Authenticity and the Rural Idyll in  
1275 a Farming Computer Game." *Journal of Rural Studies* 78 (August): 350–63.  
1276 <https://doi.org/10.1016/j.jrurstud.2020.05.002>.
- 1277 Szilágyi, Robert, Tamás Kovács, Krisztián Nagy, and László Várallyai. 2017. "Development of Farm  
1278 Simulation Application, an Example for Gamification in Higher Education." *Journal of Agricultural  
1279 Informatics* 8 (August). <https://doi.org/10.17700/jai.2017.8.2.373>.
- 1280 Treiblmaier, Horst, Lisa-maria Putz, and Paul Benjamin Lowry. 2018. "Setting a Definition, Context,  
1281 and Theory-Based Research Agenda for the Gamification of Non-Gaming Applications."  
1282 <https://papers.ssrn.com/abstract=3202034>.
- 1283 Tukey, John W. 1977. *Exploratory Data Analysis*. Vol. 2. Reading, MA.
- 1284 Unity Technologies. 2021. "Unity." <https://unity.com/>.
- 1285 Wassink, G. J., E. M. King, R. Grogono-Thomas, J. C. Brown, L. J. Moore, and L. E. Green. 2010. "A  
1286 Within Farm Clinical Trial to Compare Two Treatments (Parenteral Antibacterials and Hoof Trimming)  
1287 for Sheep Lameness with Footrot." *Preventive Veterinary Medicine* 96 (1): 93–103.  
1288 <https://doi.org/10.1016/j.prevetmed.2010.05.006>.
- 1289 Whay, H. R., D. C. J. Main, L. E. Green, and A. J. F. Webster. 2003. "Assessment of the Welfare of  
1290 Dairy Cattle Using Animal-Based Measurements: Direct Observations and Investigation of Farm  
1291 Records." *Veterinary Record* 153 (7): 197–202. <https://doi.org/10.1136/vr.153.7.197>.
- 1292 Winter, Joanne R., and Laura E. Green. 2017. "Costbenefit Analysis of Management Practices for  
1293 Ewes Lameness with Footrot." *The Veterinary Journal* 220 (February): 1–6.  
1294 <https://doi.org/10.1016/j.tvjl.2016.11.010>.
- 1295 Winter, Joanne R., Jasmeet Kaler, Eamonn Ferguson, Amy L. KilBride, and Laura E. Green. 2015.  
1296 "Changes in Prevalence of, and Risk Factors for, Lameness in Random Samples of English Sheep  
1297 Flocks: 2004/2013." *Preventive Veterinary Medicine* 122 (1): 121–28.  
1298 <https://doi.org/10.1016/j.prevetmed.2015.09.014>.
- 1299 Yoo, Hwan-Soo, and Seong-Whan Kim. 2014. "Virtual Farmers Training: Realistic Simulation with  
1300 Amusements Using Historic Simulation and Game Storyline." *International Journal of Multimedia and  
1301 Ubiquitous Engineering* 9 (5): 121–30. <https://doi.org/10.14257/ijmue.2014.9.5.11>.
